# Supplementary material
Source: publisher site journal article supplement (https://www.spandidos-publications.com/1173/downloadSupplementary)
Supplement: Supplementary file 1 [file downloadSupplementary]

## Sheet: Clinical BCR XML.merge
Table SI.
mRNA/miRNA	A0_Samples	A1_OS	A2_Event	A3_T	A4_N	A5_M	A6_Stage	A7_Grade	ablations	ablations.ablation.ablation_treatments.ablation_performed_indicator	ablations.ablation.ablation_treatments.ablation_treatment.ablation_type	ablations.ablation.ablation_treatments.ablation_treatment.ablation_type_other	ablations.ablation.ablation_treatments.ablation_treatment.days_to_ablation_performed	ablations.ablation.ablation_treatments.ablation_treatment.lesions_count	ablations.ablation.ablation_treatments.ablation_treatment.treatment_cycles_count	ablations.ablation.bcr_ablation_barcode	ablations.ablation.bcr_ablation_uuid	ablations.ablation.day_of_form_completion	ablations.ablation.embolization_treatments.embolization_performed_indicator	ablations.ablation.embolization_treatments.embolization_treatment.days_to_embolization_performed	ablations.ablation.embolization_treatments.embolization_treatment.embolization_therapy_drug_name	ablations.ablation.embolization_treatments.embolization_treatment.embolization_therapy_drug_name_other	ablations.ablation.embolization_treatments.embolization_treatment.embolization_type	ablations.ablation.embolization_treatments.embolization_treatment.embolizing_agent_utilized	ablations.ablation.embolization_treatments.embolization_treatment.embolizing_agent_utilized_other	ablations.ablation.month_of_form_completion		additional_studies	adjacent_hepatic_tissue_inflammation_extent_type	age_at_initial_pathologic_diagnosis	albumin_result_lower_limit	albumin_result_specified_value	albumin_result_upper_limit	bcr_patient_barcode	bcr_patient_uuid	bilirubin_lower_limit	bilirubin_upper_limit	cancer_first_degree_relative	child_pugh_classification_grade	creatinine_lower_level	creatinine_upper_limit	creatinine_value_in_mg_dl	day_of_form_completion	days_to_birth	days_to_death	days_to_initial_pathologic_diagnosis	days_to_last_followup	days_to_last_known_alive	drugs
yes	TCGA-DD-A73D	693	Alive	T2	NX	MX	Stage II	G1																					Mild	68	3.5	4.5	5	TCGA-DD-A73D	24170A77-94E0-4002-9D3E-A46C84E84FCA	0.1	0.3	1	A	0.6	1.1	0.8	30	-24941	Not Applicable	0	334	Not Available
yes	TCGA-DD-A39V	643	Dead	T2	NX	M0	Stage II	G3																					None	77	3.5	4	5	TCGA-DD-A39V	DD056692-4E2A-4E45-A4D0-357AF9754F0E	Not Available	Not Available	3	A	0.8	1.2	0.9	5	-28254	643	0	Not Available	Not Available
yes	TCGA-ED-A8O6	56	Dead	T3a	N0	M0	Stage IIIA	G3																					Mild	50	3.8	2.8	5.1	TCGA-ED-A8O6	7FB03840-5153-4DC6-A302-5A89AA4E1FB6	0.1	2.3	Not Available	Unknown	4.1	5.8	2.8	12	-18572	Not Applicable	0	6	Not Available
yes	TCGA-ED-A7XP	400	Alive	T2	N0	M0	Stage II	G3		YES	Ethanol Injection	Not Applicable	193	3	Not Available	TCGA-ED-A7XP-A65356	DC5CC86A-6960-47BF-9A87-B47CD01EC180	22	NO	Not Available	Not Available	Not Applicable	Not Available	Not Available	Not Applicable	9	2014		Mild	53	3.8	6.9	5.1	TCGA-ED-A7XP	CCA827CA-0066-497D-83DC-477F3B08EA6D	0.1	0.1	Not Available	Unknown	4.1	5.9	4.8	5	-19504	Not Applicable	0	6	Not Available
yes	TCGA-ED-A627	423	Alive	T1	NX	M0	Stage I	G2																					Unknown	74	Not Available	Not Available	Not Available	TCGA-ED-A627	A4AF0084-EDD4-4DCD-8975-4A59EE5DA64C	Not Available	Not Available	Not Available	Unknown	Not Available	Not Available	Not Available	28	-27303	Not Applicable	0	0	Not Available
yes	TCGA-ED-A7PX	6	Alive	T2	NX	M0	Stage II	G3																					None	48	Not Available	Not Available	Not Available	TCGA-ED-A7PX	470D52B8-3D74-4789-B714-B9869A96657B	0.1	0.9	Not Available	Unknown	4.1	5.8	17	3	-17638	Not Applicable	0	6	Not Available
no	TCGA-2Y-A9GS	724	Dead	T2	NX	MX		G2																					None	58	3.5	4	5	TCGA-2Y-A9GS	95B97198-1A1B-4F01-90F3-6C66638371D1	0.2	0.7	Not Available	Unknown	0.8	1.5	1.6	3	-21318	724	0	Not Available	Not Available
yes	TCGA-DD-AADN	898	Alive	T1	NX	MX	Stage I	G4																					Unknown	59	3.8	3.5	5.3	TCGA-DD-AADN	32E39C1D-B8E8-4EFE-B451-8EFB112D3518	0.2	1.1	Not Available	A	0.7	1.5	0.8	7	-21632	Not Applicable	0	527	Not Available
yes	TCGA-FV-A2QQ	729	Alive	T1	N0	MX	Stage I	G2																					Not Available	80	Not Available	Not Available	Not Available	TCGA-FV-A2QQ	D680DF09-368E-42B5-B540-45C41ED31042	Not Available	Not Available	Not Available	Unknown	Not Available	Not Available	Not Available	1	-29354	Not Applicable	0	0	Not Available
yes	TCGA-DD-AACD	381	Dead	T1	N0	M0	Stage I	G4																					Mild	48	3.8	3.9	5.3	TCGA-DD-AACD	41FB30AA-63B4-4CC6-A275-B77048612FA0	0.2	0.3	3	A	0.7	1.5	1	28	-17828	381	0	Not Available	Not Available
yes	TCGA-DD-A4NL	1711	Alive	T1	N0	M0	Stage I	G1																					None	46	3.5	4.4	5	TCGA-DD-A4NL	E0067280-2722-46F2-A5A8-352C77B47E38	0.1	0.3	Not Available	Unknown	0.8	1.3	1	5	-16874	Not Applicable	0	1711	Not Available
yes	TCGA-CC-A9FW	248	Alive	T3	N0	M0	Stage IIIA	G2																					Not Available	68	Not Available	Not Available	Not Available	TCGA-CC-A9FW	027322F0-D720-41F8-897C-A10E5C1424C5	Not Available	Not Available	Not Available	Unknown	Not Available	Not Available	Not Available	22	-24891	Not Applicable	0	0	Not Available
yes	TCGA-CC-A5UD	304	Dead	T3	N0	M0	Stage IIIA	G2																					Not Available	45	Not Available	Not Available	Not Available	TCGA-CC-A5UD	3837C8AC-6C9E-499B-A4E7-D42C870BCB49	Not Available	Not Available	Not Available	Unknown	Not Available	Not Available	Not Available	21	-16702	Not Applicable	0	0	Not Available
yes	TCGA-DD-AAD2	658	Alive	T1	N0	M0	Stage I	G2																					Mild	66	3.8	3.5	5.3	TCGA-DD-AAD2	03F5DE7D-45A9-4A73-8C61-ED816D4A3AC5	0.2	0.3	Not Available	A	0.7	1.5	0.8	29	-24221	Not Applicable	0	658	Not Available
yes	TCGA-DD-AACO	1876	Alive	T1	N0	M0	Stage I	G3																					Mild	40	3.8	3.7	5.3	TCGA-DD-AACO	34413807-07BE-4204-B095-5E1DD1ED87DC	0.2	0.6	Not Available	A	0.7	1.5	1.4	29	-14796	Not Applicable	0	1485	Not Available
no	TCGA-ZP-A9D1	21	Alive	T1	NX	MX		G2																					Not Available	56	Not Available	Not Available	Not Available	TCGA-ZP-A9D1	447AC9E3-0533-461A-BC92-906A7B2180C3	Not Available	Not Available	1	A	Not Available	Not Available	Not Available	28	-20584	Not Applicable	0	21	Not Available
no	TCGA-BC-A10S	1423	Dead	T3	NX	MX		G1																					None	81	Not Available	3.6	Not Available	TCGA-BC-A10S	592ef526-176a-42e0-bbeb-fb62d369a343	Not Available	0.6	Not Available	Not Available	Not Available	Not Available	Not Available	23	-29842	1423	0	Not Available	Not Available
yes	TCGA-RC-A7SH	468	Alive	T2	N0	M0	Stage II	G3																					None	42	3.1	4.1	5.2	TCGA-RC-A7SH	32A98B3D-4CBD-4DCC-AC71-428FAFC5E1C3	0.1	0.5	Not Available	A	0.3	1.2	0.8	21	-15560	Not Applicable	0	468	Not Available
yes	TCGA-DD-AAD6	672	Alive	T3a	N0	M0	Stage IIIA	G3																					Unknown	66	3.8	2.7	5.3	TCGA-DD-AAD6	418E79D1-51C7-4CEF-A1B6-E291FB13C2A5	0.2	0.6	Not Available	A	0.7	1.5	1.1	7	-24185	Not Applicable	0	672	Not Available
yes	TCGA-DD-A73C	701	Alive	T3a	N0	M0	Stage IIIA	G1																					None	65	3.5	4.9	5	TCGA-DD-A73C	79F9331C-9E00-4277-A9D1-7C848E132134	0.1	0.7	1	A	0.6	1.1	0.8	30	-23782	Not Applicable	0	230	Not Available
yes	TCGA-G3-A7M5	447	Alive	T1	NX	MX	Stage I	G2																					None	76	3.3	4.1	4.8	TCGA-G3-A7M5	869F8A17-BCED-4002-BD60-99DF84A03B93	0	0.5	Not Available	A	0.6	1.4	1.9	5	-27963	Not Applicable	0	0	Not Available
yes	TCGA-DD-AACF	365	Dead	T1	N0	M0	Stage I	G3																					Mild	68	3.8	3.5	5.3	TCGA-DD-AACF	635AAD0B-9C47-4564-821F-C00DDB280D53	0.2	0.5	Not Available	A	0.7	1.5	1.1	28	-25172	365	0	Not Available	Not Available
no	TCGA-DD-AACM	1769	Alive	T2	N0	M0	Stage II	G3																					Mild	48	3.8	4.2	5.3	TCGA-DD-AACM	173088ED-6BC0-4CCF-80E7-C647028CCCD6	0.2	1.6	Not Available	A	0.7	1.5	1.2	29	-17590	Not Applicable	0	1769	Not Available
yes	TCGA-DD-AAC8	16	Dead	T1	N0	M0	Stage I	G3																					Mild	72	3.8	4.3	5.3	TCGA-DD-AAC8	496BEEF9-80D9-4734-A23D-334AE1B6AAAB	0.2	0.6	Not Available	A	0.7	1.5	1.1	28	-26322	16	0	Not Available	Not Available
yes	TCGA-DD-AADL	636	Alive	T1	N0	M0	Stage I	G4																					Unknown	58	3.8	3.5	5.3	TCGA-DD-AADL	A7F7E313-4636-4C54-B2B7-F5928A8368E4	0.2	0.5	2	A	0.7	1.5	0.5	7	-21512	Not Applicable	0	636	Not Available
yes	TCGA-NI-A8LF	799	Alive	T1	NX	MX	Stage I	G3																					None	74	Not Available	1.2	Not Available	TCGA-NI-A8LF	420DC176-E9A8-484B-BFA3-1B84E039C26B	Not Available	0.6	1	Unknown	Not Available	Not Available	15	3	-27162	Not Applicable	0	498	Not Available
yes	TCGA-2Y-A9H5	555	Dead	T1	N0	MX	Stage I	G3																					Unknown	59	3.5	4.9	5	TCGA-2Y-A9H5	51810579-E20D-4F08-93E7-891D645931DB	0.2	0.3	2	Unknown	0.8	1.5	0.6	3	-21818	555	0	Not Available	Not Available
yes	TCGA-FV-A3I0	848	Alive	T2	NX	M0	Stage II	G2																					Not Available	76	Not Available	4.4	Not Available	TCGA-FV-A3I0	A8C2AA08-9156-4845-AD77-5E060858C757	Not Available	0.4	Not Available	Not Available	Not Available	Not Available	Not Available	16	-28101	Not Applicable	0	6	Not Available
yes	TCGA-G3-A25Y	452	Dead	T1	N0	M0	Stage I	G3																					Mild	52	0.3	0.4	0.5	TCGA-G3-A25Y	239B4298-B090-480A-A19F-9758A827AA30	0	0.7	Not Available	A	0.4	1.1	0.6	27	-19055	452	0	Not Available	Not Available
yes	TCGA-DD-AADO	453	Alive	T1	N0	M0	Stage I	G3																					Unknown	55	3.8	4.5	5.3	TCGA-DD-AADO	9F056388-7529-4FD1-AF11-C82CC350F51C	0.2	0.4	Not Available	A	0.7	1.5	0.6	7	-20139	Not Applicable	0	92	Not Available
no	TCGA-DD-A3A0	785	Dead	T1	NX	M0	Stage I	G2																					None	70	3.5	3.3	5	TCGA-DD-A3A0	AE99D9FD-1735-4217-B4EF-33B377FBD594	0.1	1.4	Not Available	A	0.8	1.2	2.7	5	-25889	785	0	Not Available	Not Available
yes	TCGA-CC-5258	129	Dead	T2	N0	M0	Stage II	G2																					Not Available	48	Not Available	Not Available	Not Available	TCGA-CC-5258	6a93206a-c25c-4e45-b0ba-0a21bd8253b6	Not Available	Not Available	Not Available	Not Available	Not Available	Not Available	Not Available	15	-17586	Not Applicable	0	0	Not Available
yes	TCGA-K7-AAU7	359	Alive	T2a	NX	MX	Stage II	G2																					Not Available	61	Not Available	Not Available	Not Available	TCGA-K7-AAU7	1EACFCC0-1D05-4441-B3D8-B0790E1C40F1	Not Available	Not Available	2	A	Not Available	Not Available	Not Available	18	-22476	Not Applicable	0	113	Not Available
yes	TCGA-BC-A10W	91	Dead	T4	NX	MX		G3																					Not Available	50	3.5	2.8	5	TCGA-BC-A10W	39baf24a-4032-4c23-b3fe-2c50df1881f6	0	1.4	1	Not Available	0.8	1.4	0.8	31	-18562	91	0	Not Available	Not Available
yes	TCGA-RC-A6M3	0	Alive	T2	N0	M0	Stage II	G3																					Not Available	24	Not Available	Not Available	Not Available	TCGA-RC-A6M3	C6A74DB2-CF97-4C7B-BE8C-557EE27E1D43	Not Available	Not Available	Not Available	Not Available	Not Available	Not Available	Not Available	9	-8899	Not Applicable	0	0	Not Available
yes	TCGA-DD-AACC	1685	Dead	T1	N0	M0	Stage I	G2																					Mild	61	3.8	3.9	5.3	TCGA-DD-AACC	ED8C0D53-5DB0-4B77-95EC-15971926E313	0.2	0.5	Not Available	A	0.7	1.5	1.3	28	-22499	1685	0	Not Available	Not Available
yes	TCGA-YA-A8S7	412	Dead	T3a	N0	MX	Stage IIIA	G3																					Mild	68	3.5	2.1	5	TCGA-YA-A8S7	BB2069D3-E699-4A8A-BB61-B3C28B98A66B	0.2	3.8	Not Available	Unknown	0.6	1.3	0.7	8	-25188	412	0	Not Available	Not Available
yes	TCGA-EP-A2KB	596	Dead	T1	NX	MX	Stage I	G2		NO						TCGA-EP-A2KB-A33377	950DA764-8CFA-48C1-8ADC-A39018424BE9	28	YES	334	Doxorubicin	Not Applicable	Chemoembolization	Other, specify	Micron Microspheres	6	2012		Not Available	46	3.8	3.8	5.1	TCGA-EP-A2KB	18C08546-BED3-4ED9-B223-479AFE633C8E	0.2	1.4	Not Available	A	Not Available	1	Not Available	26	-16835	Not Applicable	0	60	Not Available
yes	TCGA-DD-AAW0	2015	Alive	T1	N0	M0	Stage I	G2																					Mild	54	3.3	4.6	5.2	TCGA-DD-AAW0	109436AA-A655-429B-8D3B-1A43385C9016	0.2	0.2	Not Available	A	0.7	1.4	1.3	13	-19981	Not Applicable	0	1644	Not Available
yes	TCGA-G3-AAV0	476	Alive	T1	N0	M0	Stage I	G2																					None	58	3.3	4.2	4.8	TCGA-G3-AAV0	6E657705-8579-433B-AF7A-B6155B599518	0	0.6	Not Available	A	0.6	1.4	0.9	14	-21249	Not Applicable	0	260	Not Available
yes	TCGA-DD-AACE	2184	Alive	T1	N0	M0	Stage I	G3																					Mild	62	3.8	4.4	5.3	TCGA-DD-AACE	ABBCF6BD-4683-45AC-947A-51AE6EF0A244	0.2	0.9	Not Available	A	0.7	1.5	1.2	28	-22727	Not Applicable	0	1931	Not Available
yes	TCGA-DD-AADD	1231	Alive	T1	N0	M0	Stage I	G4																					Unknown	51	3.8	4.1	5.3	TCGA-DD-AADD	B44F664C-444C-4C64-A407-52FD9B55F178	0.2	0.4	Not Available	A	0.7	1.5	0.9	7	-18752	Not Applicable	0	864	Not Available
yes	TCGA-UB-A7MC	500	Alive	T3a	N0	MX	Stage IIIA	G3		NO;NO						TCGA-UB-A7MC-A67162;TCGA-UB-A7MC-A67164	57299E12-8A0A-4F20-9874-3303A63E1F71;E6E52CBB-FBEB-4D02-BD48-1EF63DFBB83C	31;31	YES;YES	343;351;371;471;471;343;351;371	Doxorubicin;Doxorubicin;Doxorubicin;Doxorubicin;Mitomycin C;Mitomycin C;Mitomycin C;Mitomycin C	Not Applicable;Not Applicable;Not Applicable;Not Applicable;Not Applicable;Not Applicable;Not Applicable;Not Applicable	Chemoembolization;Chemoembolization;Chemoembolization;Chemoembolization;Chemoembolization;Chemoembolization;Chemoembolization;Chemoembolization	Other, specify;Other, specify;Other, specify;Other, specify;Other, specify;Other, specify;Other, specify;Other, specify	Lipiodol;Lipiodol;Lipiodol;Lipiodol;Lipiodol;Lipiodol;Lipiodol;Lipiodol	10;10	2014;2014		Mild	59	3.5	3.9	4.8	TCGA-UB-A7MC	F82AFF25-0725-48D1-AEFD-D60800F7D1AB	0.2	1.5	Not Available	A	0.7	1.2	0.7	15	-21733	Not Applicable	0	438	Not Available
yes	TCGA-DD-A4NG	802	Dead	T3a	NX	M0	Stage IIIA	G2																					None	77	3.5	4.5	5	TCGA-DD-A4NG	89791F8F-DC06-4A04-B166-AFBFD6CF53DE	0.1	0.5	1	A	0.8	1.3	0.9	29	-28234	Not Applicable	0	445	Not Available
yes	TCGA-2Y-A9GZ	848	Dead	T2	NX	MX	Stage II	G2																					None	82	3.5	4.5	5	TCGA-2Y-A9GZ	0E8C3831-DEF9-4EFA-9F93-8942072D6A77	0.2	0.7	4	A	0.8	1.5	1.1	3	-30082	848	0	Not Available	Not Available
yes	TCGA-DD-A1EA	2415	Alive	T2	N0	M0	Stage II	G2		YES	Radiofrequency Ablation;Radiofrequency Ablation	Not Applicable;Not Applicable	769;1176	1;2	2;2	TCGA-DD-A1EA-A42205	D8522937-A679-4256-A8E3-256EA53BD593	15	NO	Not Available;Not Available	Not Available;Not Available	Not Applicable;Not Applicable	Not Available;Not Available	Not Available;Not Available	Not Applicable;Not Applicable	4	2013		Mild	68	3.5	3.3	5	TCGA-DD-A1EA	8052c374-9435-4588-b970-68565c56dbb7	0.1	0.9	1	A	0.8	1.3	1.2	16	-24925	Not Applicable	0	2415	Not Available
yes	TCGA-RG-A7D4	1098	Alive	T2	N0	M0	Stage II	G2																					Unknown	69	3	3	5	TCGA-RG-A7D4	08CBBB39-D05A-48B0-A966-5212C5923C8B	1	1	2	A	1	2	1	27	-25302	Not Applicable	0	734	Not Available
yes	TCGA-DD-AADI	1085	Alive	T1	N0	M0	Stage I	G3																					Unknown	43	3.8	3.8	5.3	TCGA-DD-AADI	97472E71-66EB-434B-81B0-D727765F44CB	0.2	0.5	Not Available	A	0.7	1.5	0.8	7	-15928	Not Applicable	0	763	Not Available
yes	TCGA-DD-A11C	662	Alive	T1	N0	M0	Stage I	G3																					None	69	3.5	3.6	5	TCGA-DD-A11C	023a1ad1-fb16-437e-9806-5063b47f76bd	0.1	2.3	1	A	0.9	1.4	0.9	29	-25403	Not Applicable	0	662	Not Available
yes	TCGA-DD-A1ED	2301	Alive	T1	N0	M0	Stage I	G1																					None	68	3.5	4.2	5	TCGA-DD-A1ED	0ff6364a-e6f4-47ca-a7e7-14705bf0a8df	0.1	0.8	Not Available	A	0.8	1.3	1.3	16	-25039	Not Applicable	0	1629	Not Available
yes	TCGA-GJ-A6C0	31	Dead	T2	NX	MX	Stage II	G2																					Unknown	75	Not Available	Not Available	Not Available	TCGA-GJ-A6C0	1B326242-4BE6-4F05-B5FB-07ED76B49850	Not Available	Not Available	1	Unknown	Not Available	Not Available	Not Available	27	-27626	31	0	Not Available	Not Available
yes	TCGA-ED-A66Y	296	Dead	T3a	N0	M0	Stage IIIA	G3																					Mild	51	3.8	6	5.1	TCGA-ED-A66Y	34303CDD-C31C-4B95-9965-2A5513DC322D	0.1	1	Not Available	Unknown	4.1	5.9	4.4	3	-18797	Not Applicable	0	7	Not Available
yes	TCGA-DD-AAE7	644	Alive	T1	N0	M0	Stage I	G2																					Severe	72	3.8	4.7	5.3	TCGA-DD-AAE7	427FDBF8-1603-466F-A5C6-963BB2EC3DAC	0.2	1.1	Not Available	A	0.7	1.5	0.9	14	-26568	Not Applicable	0	382	Not Available
yes	TCGA-BC-A217	1397	Dead	T2	NX	M0	Stage II	G3																					None	75	3.5	4.4	5	TCGA-BC-A217	6dcfc418-ab28-4365-95ea-c1ae254f2341	0	0.2	Not Available	Not Available	0.6	1	0.8	8	-27411	Not Applicable	0	421	Not Available
yes	TCGA-DD-AACU	1567	Alive	T1	N0	M0	Stage I	G3																					Unknown	59	3.8	4.4	5.3	TCGA-DD-AACU	88B6181C-1086-42DF-8BB9-1069EC2DC675	0.2	0.3	Not Available	A	0.7	1.5	1.1	29	-21606	Not Applicable	0	1240	Not Available
yes	TCGA-CC-A8HV	279	Dead	T2	N0	M0	Stage II	G2																					Not Available	51	Not Available	Not Available	Not Available	TCGA-CC-A8HV	5B32D3F4-9B88-42DE-AAAC-22D1D2F5CDE0	Not Available	Not Available	Not Available	Unknown	Not Available	Not Available	Not Available	22	-18935	Not Applicable	0	0	Not Available
yes	TCGA-G3-AAV4	27	Dead	T1	N0	M0	Stage I	G1																					Not Available	83	3.3	2.7	4.8	TCGA-G3-AAV4	0955D871-5413-4AB2-8FDF-B4FEB3AEEF5D	0	0.8	2	A	0.4	1.1	1.1	15	-30466	27	0	Not Available	Not Available
yes	TCGA-G3-AAV2	372	Alive	T1	N0	M0	Stage I	G1																					Not Available	50	3.3	4.2	4.8	TCGA-G3-AAV2	1724C96A-2AA3-43D4-992A-08AF948C0F45	0	0.7	Not Available	A	0.6	1.4	1	15	-18363	Not Applicable	0	295	Not Available
yes	TCGA-CC-A3MB	315	Dead	T3	N0	M0	Stage IIIA	G1																					Not Available	36	Not Available	Not Available	Not Available	TCGA-CC-A3MB	2C53D48D-E3BC-49F3-BBE0-2EEE24252B4C	Not Available	Not Available	Not Available	Not Available	Not Available	Not Available	Not Available	6	-13255	Not Applicable	0	3	Not Available
yes	TCGA-DD-A1EL	415	Dead	T2	N0	M0	Stage II	G3		NO						TCGA-DD-A1EL-A42231	6CA54E88-D6C5-4F67-B456-159E16441697	15	YES	165	Not Available	Not Applicable	Chemoembolization	Other, specify	PVA particles	4	2013		Mild	23	3.5	4.4	5	TCGA-DD-A1EL	2854ffe8-1f77-497a-bf49-11e0189fee35	0.1	0.5	Not Available	A	0.8	1.3	1	16	-8573	415	0	Not Available	Not Available
yes	TCGA-DD-AAEH	784	Alive	T1	N0	M0	Stage I	G2																					None	73	3.8	2.9	5.3	TCGA-DD-AAEH	FBB0E4BC-5398-4A7E-963C-86EA1108A2DE	0.2	0.9	Not Available	A	0.7	1.5	0.6	15	-26894	Not Applicable	0	476	Not Available
yes	TCGA-ED-A4XI	819	Alive	T2	N0	M0	Stage II	G3																					None	58	3.8	2.9	5.1	TCGA-ED-A4XI	C52ABAC9-07DA-4B3D-BF8A-2161CACF9682	0.1	1.3	Not Available	Unknown	4.1	5.9	54	22	-21497	Not Applicable	0	6	Not Available
yes	TCGA-DD-AAE4	608	Alive	T1	N0	M0	Stage I	G1		YES	Radiofrequency Ablation	Not Applicable	139	1	Not Available	TCGA-DD-AAE4-A68415	26E1A96C-4564-4BFE-9354-F0AA2EB77E4F	3	NO	Not Available	Not Available	Not Applicable	Not Available	Not Available	Not Applicable	11	2014		None	49	3.8	4	5.3	TCGA-DD-AAE4	C797D6AD-05D4-4322-BAD2-29801A986B4E	0.2	0.8	Not Available	A	0.7	1.5	0.5	14	-18009	Not Applicable	0	259	Not Available
yes	TCGA-DD-A3A4	612	Dead	T3	N0	M0	Stage IIIA	G3		NO						TCGA-DD-A3A4-A42699	E888B66F-EC27-412B-8CDF-A97F9598C732	27	YES	231;270;375	Other;Other;Other	Mitomycin C and cis-platinum;Mitomycin C and cis-platinum;Mitomycin C and cis-platinum	Chemoembolization;Chemoembolization;Chemoembolization	Other, specify;Other, specify;Other, specify	chemoembolic agent;chemoembolic agent;chemoembolic agen	4	2013		None	37	3.5	3.3	5	TCGA-DD-A3A4	AB35C9F9-3040-424D-A89F-DFF3A1365BC6	0.1	1	2	B	0.4	1.2	1	6	-13739	612	0	Not Available	Not Available
yes	TCGA-DD-A1EB	2017	Alive	T1	N0	M0	Stage I	G2		YES	Ethanol Injection;Ethanol Injection	Not Applicable;Not Applicable	506;731	Not Available;Not Available	Not Available;Not Available	TCGA-DD-A1EB-A42227	59CA7EF7-652C-416A-82B8-14E666059859	15	NO	Not Available;Not Available	Not Available;Not Available	Not Applicable;Not Applicable	Not Available;Not Available	Not Available;Not Available	Not Applicable;Not Applicable	5	2013		None	72	3.5	3.7	5	TCGA-DD-A1EB	68015cc7-d3a1-4c90-b8fb-5d14143d9960	0.1	0.3	1	B	0.6	1.1	1.3	9	-26471	Not Applicable	0	2017	Not Available
yes	TCGA-DD-A3A1	233	Dead	T3b	N0	M0	Stage IIIA	G2																					None	65	3.5	3.8	5	TCGA-DD-A3A1	877B9F6B-9B34-40ED-933F-8FEF204EDF21	0.1	0.8	1	A	0.8	1.2	1.1	6	-24046	233	0	Not Available	Not Available
yes	TCGA-XR-A8TC	1339	Alive	T1	NX	MX	Stage I	G2																					Mild	43	3.5	3.9	4.8	TCGA-XR-A8TC	4DB9DE75-9297-46E5-ACC5-9275F52A642A	0.2	0.2	Not Available	A	0.7	1.5	0.7	20	-15817	Not Applicable	0	1339	Not Available
yes	TCGA-CC-A7IE	217	Dead	T3	N0	M0	Stage IIIA	G2																					Not Available	57	Not Available	Not Available	Not Available	TCGA-CC-A7IE	220F75D7-08A4-4936-B4B2-0750E87CCDF5	Not Available	Not Available	Not Available	Unknown	Not Available	Not Available	Not Available	22	-20985	Not Applicable	0	0	Not Available
yes	TCGA-MR-A520	229	Alive	T1	NX	MX	Stage I	G1																					Not Available	58	Not Available	Not Available	Not Available	TCGA-MR-A520	25E893AD-A0FD-45AE-9AA9-9BCD7C2EC8E5	Not Available	Not Available	Not Available	Not Available	Not Available	Not Available	Not Available	11	-21398	Not Applicable	0	19	Not Available
yes	TCGA-CC-A3M9	300	Dead	T3	N0	M0	Stage IIIA	G3																					Not Available	45	Not Available	Not Available	Not Available	TCGA-CC-A3M9	8E938868-D992-47C4-BECB-93B0F7FFFE07	Not Available	Not Available	Not Available	Not Available	Not Available	Not Available	Not Available	6	-16460	Not Applicable	0	3	Not Available
yes	TCGA-DD-AAW1	1989	Alive	T3	N0	M0	Stage IIIA	G2																					Severe	55	3.3	4	5.3	TCGA-DD-AAW1	31C7D56B-4AF7-4FDB-BA83-63BF615FCC3D	0.2	0.7	Not Available	A	0.7	1.4	1.2	13	-20288	Not Applicable	0	1644	Not Available
yes	TCGA-BC-A69H	444	Alive	T2	NX	M0	Stage II	G3																					None	64	3.6	4.3	4.8	TCGA-BC-A69H	79DF037C-7D37-4E6C-A654-57708A4F87AA	0	0.4	Not Available	A	0.8	1.3	0.8	18	-23380	Not Applicable	0	120	Not Available
yes	TCGA-DD-AACS	1804	Alive	T1	N0	M0	Stage I	G3																					Unknown	39	3.8	4.3	5.3	TCGA-DD-AACS	82D6268A-DE59-4A14-ABD2-7492178FA5BD	0.2	1	Not Available	A	0.7	1.5	1.1	29	-14473	Not Applicable	0	1475	Not Available
yes	TCGA-EP-A2KC	19	Dead	T1	NX	MX	Stage I	G3																					Not Available	62	3.6	3.1	4.8	TCGA-EP-A2KC	71681DB9-FA90-4FE1-A497-67D501EB75F0	Not Available	Not Available	Not Available	A	Not Available	Not Available	Not Available	5	-22677	19	0	Not Available	Not Available
yes	TCGA-BC-A10X	770	Dead	T3a	N0	MX	Stage IIIA	G2																					None	52	3.5	3.6	5	TCGA-BC-A10X	3dc48ea9-a3c6-437f-af5a-88feb300cc5f	0	0.3	2	Not Available	0.7	1.1	0.7	31	-19140	770	0	Not Available	Not Available
yes	TCGA-ED-A82E	408	Alive	T3a	N0	M0	Stage IIIA	G2																					Mild	60	3.8	4.3	5.1	TCGA-ED-A82E	A96B67BA-6180-4B80-8792-877860421CA0	0.1	0.4	Not Available	Unknown	4.1	5.8	2.8	7	-22234	Not Applicable	0	6	Not Available
yes	TCGA-DD-A4NN	899	Dead	T1	N0	M0	Stage I	G3																					Unknown	56	3.5	4.3	5	TCGA-DD-A4NN	B96B7620-5506-4DEF-AFF2-5E888EAF3EA5	0.1	0.5	1	A	0.7	1.2	0.9	5	-20548	899	0	Not Available	Not Available
yes	TCGA-CC-A7II	399	Alive	T3	N0	M0	Stage IIIA	G3																					Not Available	54	Not Available	Not Available	Not Available	TCGA-CC-A7II	AAF7C9B5-6CB7-42BF-A0D1-07975EAE3BE9	Not Available	Not Available	Not Available	Unknown	Not Available	Not Available	Not Available	22	-20079	Not Applicable	0	0	Not Available
yes	TCGA-BC-A10U	837	Dead	T2	NX	MX		G2		YES	Radiofrequency Ablation	Not Applicable	614	2	1	TCGA-BC-A10U-A13749	C5B24C75-28AD-46A1-ACEB-8F74FEED26F8	4	NO	Not Available	Not Available	Not Applicable	Not Available	Not Available	Not Applicable	4	2011		Not Available	69	3.5	4.3	5	TCGA-BC-A10U	23103931-cc29-4f89-ae9c-79d53401ecea	0	0.4	4	Not Available	0.8	1.4	0.9	23	-25305	837	0	Not Available	Not Available
yes	TCGA-DD-A39X	1694	Dead	T1	NX	M0	Stage I	G2		YES	Radiofrequency Ablation	Not Applicable	1039	1	1	TCGA-DD-A39X-A42569	23D1697E-FE5C-4B31-9308-534FE20BB62E	25	NO	Not Available	Not Available	Not Applicable	Not Available	Not Available	Not Applicable	4	2013		None	78	3.5	4.1	5	TCGA-DD-A39X	0D0A10B4-7B99-4043-A129-89844F258156	0.1	0.5	2	A	0.6	0.9	0.9	5	-28528	1694	0	Not Available	Not Available
yes	TCGA-5R-AA1C	520	Alive	T2	N0	M0	Stage II	G2																					None	57	3.2	3	4.6	TCGA-5R-AA1C	290890EB-321C-45DC-9CD1-45676C6E5E96	0	1.8	Not Available	B	0.5	1.3	1	14	-21073	Not Applicable	0	63	Not Available
yes	TCGA-G3-AAV7	361	Alive	T2	N0	M0	Stage II	G2																					Mild	38	3.3	4	4.8	TCGA-G3-AAV7	5D259F26-3BEF-4FE4-948B-495183F5F8BE	0	0.9	Not Available	A	0.6	1.4	1.1	16	-14229	Not Applicable	0	92	Not Available
yes	TCGA-DD-AADB	1242	Alive	T1	N0	M0	Stage I	G4																					Unknown	51	3.8	4.5	5.3	TCGA-DD-AADB	5EAAF7AE-36AF-4FB4-8940-E0861983CEB0	0.2	1.5	Not Available	A	0.7	1.5	0.8	7	-18728	Not Applicable	0	890	Not Available
yes	TCGA-DD-AACA	2301	Alive	T1	N0	M0	Stage I	G3																					Mild	65	3.8	3.7	5.3	TCGA-DD-AACA	D6486001-240A-455A-980C-E06C25C61FA5	0.2	0.7	Not Available	A	0.7	1.5	1.2	28	-23973	Not Applicable	0	2000	Not Available
yes	TCGA-ED-A5KG	854	Alive	T2	N0	M0	Stage II	G2																					Severe	60	3.8	6	5.1	TCGA-ED-A5KG	CEBDAFEE-8FFD-4EE2-8DD1-9225E06623C2	0.1	0.4	Not Available	Unknown	4.1	5.8	3.9	22	-22258	Not Applicable	0	6	Not Available
yes	TCGA-MI-A75C	291	Alive	T1	N0	M0	Stage I	G3																					Not Available	64	3.5	4	4.9	TCGA-MI-A75C	A6C0DEF6-7649-485A-A679-50DAFB5EADE5	0.2	1.1	Not Available	A	0.6	1.3	1	19	-23441	Not Applicable	0	291	Not Available
yes	TCGA-5R-AA1D	449	Alive	T3a	N0	M0	Stage IIIA	G3																					None	17	3.2	3.3	4.6	TCGA-5R-AA1D	D3D3DBA9-139E-4F57-AC70-B741553D1687	0	0.5	Not Available	B	0.5	1.3	0.7	14	-6545	Not Applicable	0	61	Not Available
yes	TCGA-DD-AACK	9	Alive	T1	N0	M0	Stage I	G2																					None	70	3.8	4.6	5.3	TCGA-DD-AACK	D7CD045A-0BE2-4B6D-AEFD-5D75E57BC6F6	0.2	0.9	Not Available	A	0.7	1.5	1.3	15	-25796	Not Applicable	0	9	Not Available
yes	TCGA-EP-A12J	570	Alive	T1	NX	MX	Stage I	G1																					Not Available	62	3.8	4.2	5.1	TCGA-EP-A12J	959918d7-cb84-4745-a72f-d138176b1ecb	0.2	0.4	1	B	0.7	1.3	0.8	31	-22997	Not Applicable	0	129	Not Available
yes	TCGA-DD-AAD0	137	Alive	T1	N0	M0	Stage I	G2																					Mild	73	3.8	3.4	5.3	TCGA-DD-AAD0	09790A9B-CC2F-4D7E-A971-8FB4ECD9F791	0.2	0.8	Not Available	A	0.7	1.5	0.5	29	-26781	Not Applicable	0	137	Not Available
yes	TCGA-2Y-A9GU	1939	Alive	T1	NX	MX	Stage I	G2																					None	55	3.5	4.4	5	TCGA-2Y-A9GU	B27720A2-E240-413C-A0F1-0B1AF3621DE2	0.2	0.3	2	Unknown	0.8	1.5	0.9	3	-20187	Not Applicable	0	1569	Not Available
yes	TCGA-G3-A25S	416	Dead	T1	N0	M0	Stage I	G2																					Mild	64	0.3	0.4	0.5	TCGA-G3-A25S	B865DEC4-F051-4FBE-9405-F832FF2010D7	0	1.2	0	A	0.6	1.4	1	27	-23571	Not Applicable	0	37	Not Available
yes	TCGA-DD-A116	1622	Dead	T3	N0	M0	Stage IIIA	G3																					Not Available	68	3.5	4.1	5	TCGA-DD-A116	994347ba-3045-4ade-926f-06420fbd906c	0.1	1.1	0	A	0.8	1.4	1.1	29	-24934	1622	0	Not Available	Not Available
no	TCGA-ZP-A9D4	395	Alive	T1	NX	MX		G1																					Mild	64	3.5	4.3	5.2	TCGA-ZP-A9D4	4244912D-8527-410C-A084-A56C55EB1F82	0.2	0.4	Not Available	A	0.5	1.1	0.6	28	-23656	Not Applicable	0	395	Not Available
yes	TCGA-ZS-A9CD	1386	Dead	T2	NX	MX	Stage II	G2																					Mild	73	36	48	50	TCGA-ZS-A9CD	9197CA4C-E48C-43AF-BA61-D894FAF3CC24	0	8	Not Available	A	62	106	73	30	-26915	1386	0	Not Available	Not Available
yes	TCGA-DD-AAD3	1295	Alive	T1	N0	M0	Stage I	G2																					Mild	43	3.8	3.9	5.3	TCGA-DD-AAD3	0D13229A-304A-48A6-A761-12E68E94A4B4	0.2	0.4	Not Available	A	0.7	1.5	0.8	29	-15706	Not Applicable	0	1029	Not Available
yes	TCGA-DD-A4NH	917	Alive	T3b	N0	M0	Stage IIIB	G3																					None	65	3.5	4	5	TCGA-DD-A4NH	4012EA90-5768-4ACC-AF3A-BA954F493DB4	0.1	0.6	1	A	0.6	1.1	0.8	29	-23865	Not Applicable	0	433	Not Available
no	TCGA-DD-AADE	1202	Alive	T1	N0	M0	Stage I	G4																					Mild	50	3.8	3.9	5.3	TCGA-DD-AADE	0904FD43-E25C-4D0F-ACEE-29FAA3FD933B	0.2	0.5	Not Available	A	0.7	1.5	1.1	7	-18482	Not Applicable	0	918	Not Available
yes	TCGA-CC-5259	250	Alive	T4	N0	M0	Stage IIIC	G2																					Not Available	60	Not Available	Not Available	Not Available	TCGA-CC-5259	7444EEA6-90E8-42DD-A7B5-0AFC6D96E1E8	Not Available	Not Available	Not Available	Not Available	Not Available	Not Available	Not Available	6	-21946	Not Applicable	0	5	Not Available
yes	TCGA-DD-AAVX	1718	Alive	T2	N0	M0	Stage II	G2																					Severe	38	3.3	3.9	5.2	TCGA-DD-AAVX	AFCB9708-92B3-4727-9C0D-63E7FF22D87B	0.2	1.1	2	A	0.7	1.4	1	13	-14016	Not Applicable	0	1718	Not Available
yes	TCGA-DD-A1EC	602	Alive	T1	N0	M0	Stage I	G3																					None	20	3.5	3.2	5	TCGA-DD-A1EC	520a709a-87f6-4f3d-b2a2-9192e3b65c5b	0.1	0.4	Not Available	A	0.7	1.2	0.8	6	-7363	Not Applicable	0	602	Not Available
yes	TCGA-CC-A5UC	347	Dead	T3	N0	M0	Stage IIIA	G3																					Not Available	63	Not Available	Not Available	Not Available	TCGA-CC-A5UC	7E589EE1-FFCC-448A-A275-829CA26A597E	Not Available	Not Available	Not Available	Unknown	Not Available	Not Available	Not Available	21	-23156	Not Applicable	0	0	Not Available
yes	TCGA-DD-AAE6	141	Alive	T1	N0	M0	Stage I	G2																					None	59	3.8	4.4	5.3	TCGA-DD-AAE6	A61F823B-9164-4BD6-92F4-0A8D8FF0F55E	0.2	0.9	Not Available	A	0.7	1.5	0.8	14	-21764	Not Applicable	0	141	Not Available
yes	TCGA-DD-AADM	12	Dead	T2	N0	M0	Stage II	G3																					Unknown	58	3.8	4.1	5.3	TCGA-DD-AADM	62C02DA8-E4B4-4294-9923-8992D187FC7B	0.2	0.5	Not Available	A	0.7	1.5	0.8	7	-21349	12	0	Not Available	Not Available
yes	TCGA-K7-A5RG	519	Alive	T1	NX	MX	Stage I	G1																					Not Available	66	Not Available	Not Available	Not Available	TCGA-K7-A5RG	4FD3ED02-7B66-47BF-8B92-31FEE1093A87	Not Available	Not Available	1	Unknown	Not Available	Not Available	Not Available	21	-24218	Not Applicable	0	120	Not Available
yes	TCGA-DD-AAVZ	1900	Alive	T1	N0	M0	Stage I	G2																					None	38	3.3	3.8	5.2	TCGA-DD-AAVZ	11F69D9F-A67D-41FA-95A9-BAA194B3FCFB	0.2	1	1	A	0.7	1.4	1.2	13	-14005	Not Applicable	0	1699	Not Available
yes	TCGA-MR-A8JO	330	Alive	T1	N0	MX	Stage I	G3																					Not Available	34	3.9	4.1	5.1	TCGA-MR-A8JO	8574D285-E02A-4D2B-931B-73556A9FDA02	0.2	0.8	Not Available	Unknown	Not Available	Not Available	Not Available	9	-12669	Not Applicable	0	52	Not Available
yes	TCGA-EP-A3RK	363	Alive	T3a	NX	MX	Stage IIIA	G2																					Not Available	73	3.5	4.3	4.8	TCGA-EP-A3RK	F15279DD-5D12-460B-9BD1-B4F95681CA65	0	0.6	Not Available	A	Not Available	Not Available	Not Available	15	-26985	Not Applicable	0	13	Not Available
yes	TCGA-FV-A495	1	Alive	T2	NX	M0	Stage II	G2																					Mild	51	3.8	4	5	TCGA-FV-A495	BD48FA5E-0152-46F0-A4FA-8CF723FF2DCD	0.3	1	1	Unknown	0.6	1.1	1	21	-18740	Not Applicable	0	1	Not Available
yes	TCGA-DD-A115	2542	Dead	T3	N0	M0	Stage IIIA	G2		YES	Other	alcohol ablation	855	Not Available	1	TCGA-DD-A115-A42009	78525079-E6FC-4EFF-9561-63014E747D02	9	YES	1121;1170;1281;1477	Doxorubicin;Doxorubicin;Doxorubicin;Doxorubicin	Not Applicable;Not Applicable;Not Applicable;Not Applicable	Chemoembolization;Chemoembolization;Chemoembolization;Chemoembolization	Other, specify;Not Available;Other, specify;Other, specify	Doxorubicin, mitomycin, and Ivalon;Not Applicable;chemoembolic mixture;chemoembolic mixture	4	2013		None	53	3.5	4.1	5	TCGA-DD-A115	45b566d7-f120-471c-a94a-be7936889f2d	0.1	0.6	Not Available	A	0.1	1.2	1.1	29	-19697	2542	0	Not Available	Not Available
yes	TCGA-2Y-A9H4	1452	Alive	T1	N0	MX	Stage I	G2																					Unknown	68	3.5	4.6	5	TCGA-2Y-A9H4	801B1D2C-EB6F-4EEF-A00B-83DA939D755A	0.2	0.3	2	A	0.8	1.5	1.2	3	-25096	Not Applicable	0	1270	Not Available
yes	TCGA-DD-A39Z	601	Dead	T2	NX	M0	Stage II	G2																					Not Available	43	3.5	3.1	5	TCGA-DD-A39Z	42CB60F0-1A9E-4F59-8E2E-50C25E85CB98	0.1	1.2	1	B	0.6	0.9	0.7	5	-15930	601	0	Not Available	Not Available
yes	TCGA-G3-A25T	1553	Alive	T3	N0	M0	Stage IIIA	G2																					None	45	0.3	0.4	0.5	TCGA-G3-A25T	F6E5979D-D6A9-4408-BD1B-1B37D1064E83	0	2	Not Available	A	0.4	1.4	0.7	27	-16461	Not Applicable	0	1175	Not Available
yes	TCGA-DD-A113	2425	Alive	T2	N0	M0	Stage II	G3		YES	Other;Other;Other	percutaneous laser ablation;percutaneous laser ablation;percutaneous laser ablation	1994;2232;2351	1;3;1	1;1;1	TCGA-DD-A113-A43738	EE8FD1C9-41B0-4929-BDE9-08321DBA7EF2	2	NO	Not Available;Not Available;Not Available	Not Available;Not Available;Not Available	Not Applicable;Not Applicable;Not Applicable	Not Available;Not Available;Not Available	Not Available;Not Available;Not Available	Not Applicable;Not Applicable;Not Applicable	6	2013		None	55	3.5	4.3	5	TCGA-DD-A113	aeb17d2b-fa8c-4989-bf3a-d2c74b785455	0.1	0.5	Not Available	A	0.7	1.2	0.8	29	-20188	Not Applicable	0	1678	Not Available
yes	TCGA-G3-A25U	1636	Alive	T1	N0	M0	Stage I	G3																					Mild	63	0.3	0.3	0.5	TCGA-G3-A25U	B9835DC5-BF31-4541-A973-E8CA802D80BA	0	0.3	Not Available	A	0.4	1.1	0.5	27	-23207	Not Applicable	0	1231	Not Available
yes	TCGA-BC-4072	1490	Dead	T3	N0	M0	Stage IIIA	G3																					Not Available	74	3.5	4.4	5	TCGA-BC-4072	5c9a21a3-d471-401a-9568-59dc84245d28	0	0.5	7	Not Available	0.7	1.1	1	20	-27162	1490	0	Not Available	Not Available
yes	TCGA-G3-AAV3	412	Alive	T2	N0	M0	Stage II	G2																					Severe	58	3.4	4.4	4.8	TCGA-G3-AAV3	EFC865FD-7C74-4361-9D7A-EEF923DBCD24	0	0.6	1	A	0.5	0.9	0.6	15	-21449	Not Applicable	0	279	Not Available
yes	TCGA-G3-A7M8	430	Alive	T1	NX	MX	Stage I	G1																					Unknown	31	3.3	3.5	4.8	TCGA-G3-A7M8	01CC571C-A47C-4548-9C14-5E51C79B095B	0	1.8	Not Available	A	0.6	1.4	0.7	5	-11527	Not Applicable	0	0	Not Available
yes	TCGA-DD-AACH	195	Dead	T2	N0	M0	Stage II	G3																					Mild	69	3.8	4.3	5.3	TCGA-DD-AACH	219B067C-522F-4971-B0D0-86F9971D369D	0.2	1.5	Not Available	A	0.7	15	1.2	28	-25544	195	0	Not Available	Not Available
yes	TCGA-UB-A7MF	214	Dead	T3a	NX	MX	Stage IIIA	G2																					Unknown	56	3.5	3.6	4.8	TCGA-UB-A7MF	8EEF926B-F316-4FDB-B84A-262010258FEB	0.2	1.1	1	A	0.7	1.2	0.9	16	-20815	214	0	Not Available	Not Available
yes	TCGA-XR-A8TG	898	Alive	T1	NX	M0	Stage I	G2																					Mild	58	3.5	4.3	4.8	TCGA-XR-A8TG	1D7D5166-6582-4EA1-B242-37C2C3919A3C	0.2	0.5	2	Not Available	0.7	1.5	0.9	20	-21544	Not Applicable	0	867	Not Available
yes	TCGA-DD-A1EE	349	Dead	T3	N0	M0	Stage IIIA	G3																					Severe	73	3.5	2.7	5	TCGA-DD-A1EE	654af137-70d9-4ee4-9f69-793e352d30f8	0.1	0.5	Not Available	B	0.8	1.3	1.2	10	-26858	Not Applicable	0	204	Not Available
yes	TCGA-DD-AADS	474	Alive	T1	N0	M0	Stage I	G2																					Unknown	63	3.8	3.7	5.3	TCGA-DD-AADS	460A3CBD-C63C-4E6F-B670-2619687AC5A0	0.2	0.7	1	A	0.7	1.5	0.9	7	-23227	Not Applicable	0	216	Not Available
yes	TCGA-DD-A3A5	3125	Dead	T3	N0	M0	Stage III	G2		NO						TCGA-DD-A3A5-A42572	DE62BB09-B68C-42AB-B933-D4B5995B733C	23	YES	260	Not Available	Not Applicable	Chemoembolization	Not Available	Not Applicable	4	2013		None	66	3.5	4.2	5	TCGA-DD-A3A5	D8549D23-37D4-42BD-B472-F49BBEBD09B0	0.1	0.8	Not Available	A	0.6	0.9	0.7	5	-24288	3125	0	Not Available	Not Available
yes	TCGA-BC-A10Z	34	Dead	T1	N0	MX	Stage I	G2																					None	62	3.5	3.1	5	TCGA-BC-A10Z	709f1e4d-f5e8-4a0b-8254-23f037f4bae7	0	0.6	1	Not Available	0.7	1.1	1.2	1	-22913	34	0	Not Available	Not Available
yes	TCGA-DD-A119	223	Dead	T3a	N0	M1	Stage IV	G3																					None	40	3.5	3.9	5	TCGA-DD-A119	66c6f413-b7a8-4d7c-9e1d-c4fb257b9e5c	0.1	1.6	2	A	0.9	1.4	1.3	29	-14613	223	0	Not Available	Not Available
yes	TCGA-CC-5261	97	Dead	T2	N0	M0	Stage II	G2																					Not Available	44	Not Available	Not Available	Not Available	TCGA-CC-5261	1ad7f17e-b3b8-40e9-aab8-5a17e0aec408	Not Available	Not Available	Not Available	Not Available	Not Available	Not Available	Not Available	18	-16373	Not Applicable	0	12	Not Available
yes	TCGA-5R-AAAM	46	Dead	T2	N0	M0	Stage II	G2																					Severe	65	3.2	3	4.6	TCGA-5R-AAAM	477AFFB9-7C8B-4895-A4F3-6CC6EF8EC5E4	0	0.6	Not Available	A	0.5	1.3	0.7	14	-24020	46	0	Not Available	Not Available
yes	TCGA-DD-AACW	1424	Alive	T1	N0	M0	Stage I	G3																					Unknown	43	3.8	4	5.3	TCGA-DD-AACW	67A00F5F-C753-48F9-BC24-8287F50EC776	0.2	0.6	Not Available	A	0.7	1.5	1	29	-15872	Not Applicable	0	1157	Not Available
yes	TCGA-CC-A7IL	278	Dead	T3	N0	M0	Stage IIIA	G1																					Not Available	61	Not Available	Not Available	Not Available	TCGA-CC-A7IL	B54DF65F-8A6B-4405-9918-90D53418804C	Not Available	Not Available	Not Available	Unknown	Not Available	Not Available	Not Available	22	-22319	Not Applicable	0	0	Not Available
yes	TCGA-FV-A23B	1852	Dead	T2	N0	M0	Stage II	Not Available		YES	Radiofrequency Ablation	Not Applicable	1501	1	4	TCGA-FV-A23B-A56106	90DB9C36-2FC9-4029-B149-5FB11F680DB6	28	NO	Not Available	Not Available	Not Applicable	Not Available	Not Available	Not Applicable	1	2014		Not Available	70	Not Available	Not Available	Not Available	TCGA-FV-A23B	C95ED407-BCC2-44AA-BC59-BF7549F2D665	Not Available	Not Available	Not Available	Not Available	Not Available	Not Available	Not Available	18	-25788	Not Applicable	0	987	Not Available
yes	TCGA-DD-A3A6	3258	Dead	T2	N0	M0	Stage II	G2																					None	72	3.5	4.3	5	TCGA-DD-A3A6	C4C4820B-6F4C-4CDD-B233-4D22F5933FD9	0.1	0.4	Not Available	A	0.6	0.9	1	6	-26319	3258	0	Not Available	Not Available
yes	TCGA-O8-A75V	538	Alive	T1	NX	MX	Stage I	G2																					Mild	54	2.9	3.8	4.4	TCGA-O8-A75V	76CC9C06-0827-465E-BAB3-5F4115295EBE	0.3	1.9	1	A	0.5	1.5	1	29	-19850	Not Applicable	0	135	Not Available
yes	TCGA-CC-5260	87	Dead	T4	N0	M0	Stage IIIC	G1																					Not Available	61	Not Available	Not Available	Not Available	TCGA-CC-5260	ca8afb2c-be3d-41e8-8dbc-19fe7ab6154b	Not Available	Not Available	Not Available	Not Available	Not Available	Not Available	Not Available	15	-22345	Not Applicable	0	0	Not Available
yes	TCGA-DD-AADJ	1066	Alive	T1	N0	M0	Stage I	G3																					Unknown	70	3.8	4.2	5.3	TCGA-DD-AADJ	1D880AEA-9EFE-4A43-8A6A-6A81801DA9E0	0.2	0.6	Not Available	A	0.7	1.5	0.6	7	-25863	Not Applicable	0	730	Not Available
no	TCGA-DD-A4NK	1210	Dead	T3	N0	M0	Stage IIIA	G2		NO						TCGA-DD-A4NK-A43137	1C367DCC-24E5-449B-9392-4AC3076FAA2E	13	YES	917	Not Available	Not Applicable	Chemoembolization	Y-90 Therasphere	Not Applicable	5	2013		None	80	3.5	4.1	5	TCGA-DD-A4NK	5B8D04B2-EF40-4216-A3BB-42520EFBE863	0.1	0.5	3	A	0.7	1.2	1.1	5	-29244	1210	0	Not Available	Not Available
yes	TCGA-4R-AA8I	262	Dead	T2	NX	MX	Stage II	G2																					None	66	3.5	3.8	4.8	TCGA-4R-AA8I	91A0C8CD-4F23-4569-8E5C-E5442F7AF530	0.4	1.2	Not Available	A	0.6	1.3	0.7	5	-24279	Not Applicable	0	216	Not Available
yes	TCGA-DD-A1EK	558	Dead	T4	N0	M1	Stage IVB	G2		YES	Radiofrequency Ablation	Not Applicable	0	3	1	TCGA-DD-A1EK-A42206	61C165ED-E7E2-41EE-B4E9-C9368BA49FAC	15	YES	286	Not Available	Not Applicable	Chemoembolization	Not Available	Not Applicable	4	2013		Mild	64	3.5	4.3	5	TCGA-DD-A1EK	A5E4412B-0E49-4D86-9CCE-71F440A84048	0.1	0.5	1	A	0.6	1.1	0.7	9	-23437	558	0	Not Available	Not Available
yes	TCGA-DD-A11A	79	Alive	T1	N0	M0	Stage I	G3																					None	67	Not Available	Not Available	Not Available	TCGA-DD-A11A	609c82fd-eb3a-46d7-8c09-0cde281a50b3	0.1	3.6	Not Available	Not Available	0.9	1.4	1.1	29	-24646	Not Applicable	0	79	Not Available
yes	TCGA-BC-A10Q	1135	Dead	T2	NX	MX		Not Available		NO						TCGA-BC-A10Q-A13754	38B7049A-E74F-4548-9AAE-D604D4C697BD	4	YES	217	Other	Doxorubicon and Mitomycin C	Chemoembolization	Other, specify	PVA particles	4	2011		Not Available	72	3.5	4.1	5	TCGA-BC-A10Q	dfa15fbe-bb14-40ce-afc6-70694112e3e2	Not Available	0.5	1	Not Available	0.7	1.1	0.6	23	-26400	1135	0	Not Available	Not Available
yes	TCGA-DD-A73B	283	Dead	T1	N0	M0	Stage I	G2																					Unknown	72	3.5	3.5	5	TCGA-DD-A73B	5449C232-56F1-4E03-9421-ABA3AE180107	0.1	2.1	1	B	0.6	1.1	0.9	30	-26390	283	0	Not Available	Not Available
yes	TCGA-DD-AACZ	171	Dead	T1	N0	M0	Stage I	G4																					Unknown	63	3.8	4.5	5.3	TCGA-DD-AACZ	CCE2BB32-84CB-4991-9628-1EA408A9B11A	0.2	0.4	Not Available	A	0.7	1.5	0.6	29	-23230	171	0	Not Available	Not Available
yes	TCGA-DD-AADW	587	Alive	T1	N0	M0	Stage I	G3																					None	48	3.8	4.3	4.3	TCGA-DD-AADW	1BCF1762-7926-45F6-A367-D45FC3AF7BC3	0.2	1	Not Available	A	0.7	1.5	0.8	14	-17781	Not Applicable	0	203	Not Available
yes	TCGA-UB-AA0U	327	Alive	T2	NX	MX	Stage II	G2		NO;YES	Radiofrequency Ablation	Not Applicable	326	1	3	TCGA-UB-AA0U-A63752;TCGA-UB-AA0U-A67167	77D7BFCB-AB00-4BE5-9602-0FFCA3FAF0BE;22C851AD-089C-49DA-8125-1D131A0ACF03	16;31	YES;NO	161;205;Not Available	Doxorubicin;Doxorubicin;Not Available	Not Applicable;Not Applicable;Not Applicable	Chemoembolization;Chemoembolization;Not Available	Other, specify;Other, specify;Not Available	Ethiodol;Ethiodol;Not Applicable	8;10	2014;2014		Mild	60	3.5	3.9	4.8	TCGA-UB-AA0U	AE8D4B34-D40A-482D-9D45-23242843DF00	0.2	0.7	2	A	0.7	1.2	0.6	16	-21985	Not Applicable	0	253	Not Available
yes	TCGA-G3-A3CK	585	Alive	T1	N0	M0	Stage I	G2																					Mild	61	0.3	0.2	0.5	TCGA-G3-A3CK	39EB1DB0-2722-4AF4-8254-D0E10256C64D	0	0.8	1	A	0.6	1.4	1.1	16	-22462	Not Applicable	0	27	Not Available
yes	TCGA-CC-5263	129	Dead	T3	N0	M0	Stage IIIA	G1																					Not Available	35	Not Available	Not Available	Not Available	TCGA-CC-5263	a6af3061-1484-4f6c-bb4b-c8f4626b4161	Not Available	Not Available	Not Available	Not Available	Not Available	Not Available	Not Available	18	-12863	129	0	Not Available	Not Available
yes	TCGA-DD-AAE3	566	Alive	T1	N0	M0	Stage I	G2																					None	50	3.8	4.7	5.3	TCGA-DD-AAE3	3C969BDF-CAE8-44F5-839F-5ABD4CBA0EC8	0.2	1.1	Not Available	A	0.7	1.5	0.8	14	-18271	Not Applicable	0	300	Not Available
yes	TCGA-DD-AAD8	1219	Alive	T1	N0	M0	Stage I	G2																					Mild	73	3.8	4.3	5.3	TCGA-DD-AAD8	24B66729-242B-4771-819D-77C9A1FCBB10	0.2	0.3	Not Available	A	0.7	1.5	0.6	7	-26781	Not Applicable	0	959	Not Available
yes	TCGA-BC-A69I	387	Alive	T1	N0	M0	Stage I	G1																					None	69	Not Available	Not Available	Not Available	TCGA-BC-A69I	70AECC90-17F0-4064-8EBB-BE81F9B1D7FD	0	1.2	1	Unknown	0.7	1.3	1.2	18	-25370	Not Applicable	0	16	Not Available
yes	TCGA-2Y-A9H0	3675	Alive	T3	N0	M0	Stage IIIA	G1																					None	49	3.5	2	5	TCGA-2Y-A9H0	492FF93F-432B-4B73-8706-632FB2C83EB4	0.2	0.8	Not Available	Unknown	0.8	1.5	0.8	3	-18109	Not Applicable	0	3675	Not Available
yes	TCGA-CC-A8HS	300	Dead	T3	N1	M0	Stage IIIC	G1																					Not Available	18	Not Available	Not Available	Not Available	TCGA-CC-A8HS	D18CD259-267E-47B5-9353-AD3454E048A0	Not Available	Not Available	Not Available	Unknown	Not Available	Not Available	Not Available	22	-6617	Not Applicable	0	0	Not Available
yes	TCGA-CC-A7IH	365	Alive	T3	N0	M0	Stage IIIA	G1																					Not Available	58	Not Available	Not Available	Not Available	TCGA-CC-A7IH	E4E0BC11-AD61-4419-857C-44FB5C7877A3	Not Available	Not Available	Not Available	Unknown	Not Available	Not Available	Not Available	22	-21381	Not Applicable	0	0	Not Available
yes	TCGA-DD-A3A7	419	Dead	T3b	N0	M0	Stage IIIB	G3																					Mild	67	Not Available	Not Available	Not Available	TCGA-DD-A3A7	614C0ECF-6A84-4C86-8706-79BE5BB00991	0.1	0.8	4	Unknown	0.8	1.2	1.4	9	-24599	419	0	Not Available	Not Available
yes	TCGA-BC-A3KF	8	Alive	T1	NX	M0	Stage I	G2																					Not Available	66	Not Available	Not Available	Not Available	TCGA-BC-A3KF	07DD49FC-8A76-41E8-9EB3-107336F68701	Not Available	Not Available	2	Not Available	0.6	1	0.8	19	-24328	Not Applicable	0	8	Not Available
no	TCGA-BC-A112	153	Dead	T3	NX	MX		G2																					Not Available	80	3.5	4.1	5	TCGA-BC-A112	a2c17e87-d8bc-4160-88ae-e3e894d013e4	0	0.3	Not Available	Not Available	0.7	1.3	2.1	1	-29511	153	0	Not Available	Not Available
no	TCGA-MI-A75H	747	Alive		NX	MX		Not Available		YES	Radiofrequency Ablation	Not Applicable	350	1	1	TCGA-MI-A75H-A51546	DF17533C-CE9B-483C-8C88-23C6240447E1	20	YES	746	Doxorubicin	Not Applicable	Chemoembolization	Plastic Beads	Not Applicable	11	2013		Not Available	77	3.5	3.3	4.9	TCGA-MI-A75H	F3F6BA92-C68F-4313-99F4-0281272E02B6	0.2	2.3	Not Available	B	0.6	1.3	Not Available	20	-28371	Not Applicable	0	391	Not Available
yes	TCGA-DD-AAEB	478	Alive	T1	N0	M0	Stage I	G2																					Unknown	60	3.8	4.1	5.3	TCGA-DD-AAEB	F0ECE8E2-A6B0-4ED9-A613-D2FBB20E51B1	0.2	0.3	Not Available	A	0.7	1.5	0.6	14	-22121	Not Applicable	0	370	Not Available
yes	TCGA-2Y-A9H2	1731	Alive	T1	N0	MX	Stage I	G3																					None	64	3.5	4.5	5	TCGA-2Y-A9H2	CF7F0473-EAF3-4259-A68E-475A782FC84C	0.2	0.4	Not Available	Unknown	0.8	1.5	1.4	3	-23653	Not Applicable	0	1582	Not Available
yes	TCGA-DD-AAE9	722	Alive	T1	N0	M0	Stage I	G3																					Mild	69	3.8	4.1	5.3	TCGA-DD-AAE9	4C960EEE-E4B5-499D-A596-238AA78745A4	0.2	0.7	Not Available	A	0.7	1.5	0.9	14	-25451	Not Applicable	0	386	Not Available
yes	TCGA-G3-A3CG	673	Alive	T1	N0	M0	Stage I	G2																					Severe	80	0.3	0.4	0.5	TCGA-G3-A3CG	8A14D153-BBF7-4512-A067-976EDFB65F91	0.3	0.3	Not Available	A	0.6	1.4	0.9	27	-29432	Not Applicable	0	254	Not Available
yes	TCGA-DD-AAED	763	Alive	T1	N0	M0	Stage I	G3		YES	Radiofrequency Ablation;Radiofrequency Ablation;Radiofrequency Ablation	Not Applicable;Not Applicable;Not Applicable	365;468;594	1;1;1	2;2;1	TCGA-DD-AAED-A68425	A79F710A-661B-4E19-BED7-1E5CA8496A81	3	YES	215;331;401	Other;Other;Other	adriamycin;adriamycin;adriamycin	Chemoembolization;Chemoembolization;Chemoembolization	Gelfoam;Gelfoam;Gelfoam	Not Applicable;Not Applicable;Not Applicable	11	2014		Mild	51	3.8	4	5.3	TCGA-DD-AAED	527D2BC3-7FDD-4B08-839D-67E2F246DB04	0.2	0.6	Not Available	A	0.7	1.5	0.5	15	-18722	Not Applicable	0	470	Not Available
yes	TCGA-KR-A7K8	906	Alive	T1	N0	M0	Stage I	G1																					None	57	3.5	3.3	4.9	TCGA-KR-A7K8	4B0E544C-4090-4EBB-B3E5-2623AA91356C	0.2	1.9	1	Unknown	0.7	1.3	1.1	28	-20914	Not Applicable	0	741	Not Available
yes	TCGA-EP-A26S	608	Alive	T1	N0	MX	Stage I	G2																					Mild	70	3.8	3.5	5.1	TCGA-EP-A26S	B7D6621C-8BCE-4A01-8588-9D7761D9372B	0.2	0.4	Not Available	Not Available	Not Available	Not Available	Not Available	19	-25677	Not Applicable	0	111	Not Available
yes	TCGA-KR-A7K7	951	Alive	T2	N0	M0	Stage II	G1																					Not Available	61	3.5	3.4	4.9	TCGA-KR-A7K7	7BA3D8F1-0C26-4C49-8D6B-0F2875B58DAF	0.2	1.4	Not Available	Unknown	0.5	1	0.8	27	-22587	Not Applicable	0	407	Not Available
yes	TCGA-BD-A2L6	1363	Alive	T2	NX	MX		G2																					None	69	3.4	3.7	5	TCGA-BD-A2L6	13A97CEE-76B0-46A1-B728-D87B2248311E	0.3	0.9	Not Available	A	0.5	1.4	1.2	10	-25489	Not Applicable	0	289	Not Available
yes	TCGA-DD-AADR	2028	Alive	T1	N0	M0	Stage I	G3																					Mild	58	3.8	4.4	5.3	TCGA-DD-AADR	899D8EA5-49DC-4970-8848-EA6EA088A272	0.2	0.9	Not Available	A	0.7	1.5	1	7	-21217	Not Applicable	0	1742	Not Available
yes	TCGA-BW-A5NP	0	Alive	T2	N0	M1	Stage IV	G3																					Mild	26	Not Available	Not Available	Not Available	TCGA-BW-A5NP	56A82A56-0241-4D3D-9DE2-696B0C36DF91	Not Available	Not Available	Not Available	Unknown	Not Available	Not Available	Not Available	26	-9809	Not Applicable	0	0	Not Available
yes	TCGA-ED-A7PZ	6	Alive	T2	NX	M0	Stage II	G2																					Mild	61	3.8	4.2	5.1	TCGA-ED-A7PZ	87750E70-3AF7-452A-9AA5-375ACD3843EA	0.1	0.9	Not Available	Unknown	4	5.8	7	7	-22601	Not Applicable	0	6	Not Available
yes	TCGA-2Y-A9GT	1624	Dead	T1	NX	MX	Stage I	G2		NO						TCGA-2Y-A9GT-A66917	2D8CCE67-5CA1-4B90-AAFD-04B8C2CF2B5D	27	YES	Not Available;1547	Doxorubicin;Not Available	Not Applicable;Not Applicable	Chemoembolization;Radioembolization	Other, specify;Y-90 Therasphere	LC beads;Not Applicable	10	2014		None	51	3.5	3.7	5	TCGA-2Y-A9GT	31A2ECC5-2D45-4823-8187-DC701DD412A8	0.2	0.4	1	C	0.8	1.5	0.8	3	-18768	1624	0	Not Available	Not Available
yes	TCGA-RC-A6M6	9	Alive	T2	NX	M0	Stage II	G3																					Not Available	75	3.5	2.8	4.8	TCGA-RC-A6M6	A62F065E-7491-493A-87B3-D213CD87091D	0.2	2.3	Not Available	B	0.8	1.3	0.8	9	-27649	Not Applicable	0	9	Not Available
yes	TCGA-RC-A6M5	15	Alive	T1	N1	M0	Stage IVA	G2																					Not Available	20	3.5	3.9	4.8	TCGA-RC-A6M5	D504EE30-6955-4A7B-9311-55AD3DECADD5	0.2	0.5	Not Available	A	0.8	1.3	0.4	9	-7634	Not Applicable	0	15	Not Available
yes	TCGA-WJ-A86L	345	Alive	T1	NX	MX	Stage I	G2																					None	68	3.4	4.2	4.8	TCGA-WJ-A86L	63D475EF-8F26-45ED-AE80-CFA87E68B2F5	0.1	0.5	Not Available	A	0.5	1.1	0.9	29	-25018	Not Applicable	0	31	Not Available
yes	TCGA-DD-AAE2	638	Alive	T1	N0	M0	Stage I	G3																					None	51	3.8	4.4	5.3	TCGA-DD-AAE2	56447EB8-C50C-4E31-A29E-BDE6BFD31AF4	0.2	0.4	Not Available	A	0.7	1.5	0.8	14	-18695	Not Applicable	0	288	Not Available
yes	TCGA-MI-A75G	698	Alive	T2	N0	M0	Stage II	G2																					Not Available	63	3.5	2.3	4.9	TCGA-MI-A75G	22DD3876-1F2C-4DDD-8FAE-F5FB820993BA	0.2	1.7	1	B	0.6	1.3	0.5	20	-23284	Not Applicable	0	433	Not Available
yes	TCGA-G3-A5SJ	698	Alive	T1	NX	M0	Stage I	G2		YES	Radiofrequency Ablation	Not Applicable	364	1	1	TCGA-G3-A5SJ-A42748	743F0876-028E-4792-9D8B-F8673D375F17	30	NO	Not Available	Not Available	Not Applicable	Not Available	Not Available	Not Applicable	4	2013		Mild	59	3.3	4.1	4.8	TCGA-G3-A5SJ	2C8A1E74-33DE-453F-8D1E-E226185E52FC	0	0.5	Not Available	B	0.6	1.4	1.3	15	-21848	Not Applicable	0	364	Not Available
yes	TCGA-DD-AACB	2324	Alive	T1	N0	M0	Stage I	G3																					Mild	74	3.8	4.1	5.3	TCGA-DD-AACB	6D2E8BC2-CA86-41C1-AE49-289E20FCE758	0.2	0.8	Not Available	A	0.7	1.5	1.1	28	-27103	Not Applicable	0	1800	Not Available
yes	TCGA-DD-A1EH	1495	Alive	T3	N0	M0	Stage III	G3		YES	Radiofrequency Ablation	Not Applicable	126	Not Available	1	TCGA-DD-A1EH-A45785	5BD6AA35-352F-459E-BFCB-FDD1929F1153	22	NO	Not Available	Not Available	Not Applicable	Not Available	Not Available	Not Applicable	7	2013		None	23	3.5	4.7	5	TCGA-DD-A1EH	cab5b264-abab-4bdb-816e-9d2c0ac30629	0.1	1	1	B	0.8	1.3	1	16	-8499	Not Applicable	0	1036	Not Available
yes	TCGA-BC-A110	2116	Dead	T1	NX	MX		G1																					Not Available	51	3.5	3.7	5	TCGA-BC-A110	cf028bce-d20d-42b8-8507-1ec94a391e85	0	0.3	2	Not Available	0.7	1.1	3.5	1	-18951	2116	0	Not Available	Not Available
yes	TCGA-HP-A5MZ	91	Dead	T1	NX	M0	Stage I	G2																					Not Available	78	Not Available	Not Available	Not Available	TCGA-HP-A5MZ	2D00F09F-0074-46C8-B357-B5F33567762A	Not Available	Not Available	Not Available	Unknown	62	120	124	26	-22702	91	0	Not Available	Not Available
no	TCGA-2V-A95S			T2	NX	MX	Stage II	G3																					Severe	Not Available	3.5	4.2	5.2	TCGA-2V-A95S	2C041473-EAAA-4B7C-9B2E-B9DA3543AD18	0	1.5	Not Available	A	0.7	1.2	0.6	15	Not Available	Not Applicable	Not Available	Not Available	Not Available
yes	TCGA-G3-A7M9	56	Dead	T3b	NX	MX	Stage IIIB	G2																					None	70	3.3	3.3	4.8	TCGA-G3-A7M9	115B754D-8559-4F1D-AF44-FCD8C2CEF86A	0	0.4	Not Available	A	0.6	1.4	1	5	-25588	56	0	Not Available	Not Available
yes	TCGA-BC-A3KG	680	Alive	T2	N0	M0	Stage II	G3																					Not Available	68	3.5	3.6	5	TCGA-BC-A3KG	75F43FCA-200A-48B0-BB67-0693D7B91119	0	0.5	Not Available	Not Available	0.6	1	0.7	19	-25061	Not Applicable	0	252	Not Available
yes	TCGA-DD-AADP	458	Alive	T1	N0	M0	Stage I	G3																					Unknown	45	3.8	3.7	5.3	TCGA-DD-AADP	96D42ECC-1157-453A-9661-9248DDF8F273	0.2	0.6	Not Available	A	0.7	1.5	0.5	7	-16760	Not Applicable	0	120	Not Available
no	TCGA-G3-A25W	935	Alive	T3b	N0	M0	Stage IIIB	G2																					None	79	0.3	0.4	0.5	TCGA-G3-A25W	06AC44E9-1226-4202-828B-6F224766D7AC	0	0.3	3	A	0.4	1.1	1.5	27	-29018	Not Applicable	0	391	Not Available
yes	TCGA-WX-AA47	556	Dead	T3a	NX	MX	Stage IIIA	G2																					Mild	33	3.5	2.8	5	TCGA-WX-AA47	39E147C9-2ACB-4BA8-A991-E43E1719B2D8	Not Available	0.2	Not Available	A	0.5	1.2	0.6	10	-12056	556	0	Not Available	Not Available
yes	TCGA-UB-A7MD	52	Dead	T1	N0	MX	Stage I	G3																					Unknown	67	3.5	3.5	4.8	TCGA-UB-A7MD	C49B41BF-0025-4682-966B-CFE8FB2B2546	0.2	0.8	Not Available	A	0.7	1.2	1	15	-24717	52	0	Not Available	Not Available
yes	TCGA-ED-A97K	6	Alive	T3a	N0	M0	Stage IIIA	G2																					Mild	54	3.8	8	5.1	TCGA-ED-A97K	8778DC9E-A7DB-4464-A8AF-11ADDB5E441A	0.1	1	Not Available	Unknown	4	5.8	4.6	18	-20073	Not Applicable	0	6	Not Available
yes	TCGA-DD-A73F	1085	Alive	T1	N0	M0	Stage I	G1																					None	77	3.5	4.6	5	TCGA-DD-A73F	870C86E7-D6E1-4F9D-BB0B-BD1C66D6BCDE	0.1	0.5	1	A	0.6	1.1	1	30	-28234	Not Applicable	0	843	Not Available
yes	TCGA-DD-AA3A	410	Dead	T1	N0	MX	Stage I	G4																					None	81	3.5	4.9	5	TCGA-DD-AA3A	56ABD1C1-8F22-4856-8B0A-73D7E092BDB3	0.1	0.8	1	A	0.6	1.1	0.7	27	-29712	410	0	Not Available	Not Available
yes	TCGA-FV-A2QR	581	Dead	T1	N0	M0	Stage I	G1																					Not Available	75	Not Available	Not Available	Not Available	TCGA-FV-A2QR	D3A03F7A-3482-4548-957E-05C692B20101	Not Available	Not Available	1	Not Available	Not Available	Not Available	Not Available	9	Not Available	581	0	Not Available	Not Available
yes	TCGA-CC-A5UE	272	Dead	T4	N0	M0	Stage IIIB	G2																					Not Available	48	Not Available	Not Available	Not Available	TCGA-CC-A5UE	23D8E6A0-FA79-4323-A0A6-2DEA2A319667	Not Available	Not Available	Not Available	Unknown	Not Available	Not Available	Not Available	21	-17805	Not Applicable	0	0	Not Available
yes	TCGA-5C-A9VG	328	Alive	T2	N0	M0	Stage II	G2																					None	58	Not Available	Not Available	Not Available	TCGA-5C-A9VG	073E51F9-FB79-4A5F-9BA0-2C9AF03C0B85	Not Available	Not Available	Not Available	A	Not Available	Not Available	Not Available	26	-21273	Not Applicable	0	328	Not Available
yes	TCGA-FV-A4ZP	2486	Dead	T3	NX	M0	Stage IIIA	G2																					Unknown	78	Not Available	Not Available	Not Available	TCGA-FV-A4ZP	5C08008D-5ED4-4480-BD00-C8A2D8C787DC	Not Available	Not Available	Not Available	Unknown	Not Available	Not Available	Not Available	15	-28771	Not Applicable	0	1836	Not Available
yes	TCGA-DD-A73E	44	Alive	T1	N0	M0	Stage I	G1																					Mild	66	3.5	4.7	5	TCGA-DD-A73E	E0863874-F7B8-49B6-A88B-5AE5F1EC2B15	0.1	0.4	2	A	0.8	1.3	1.2	30	-24377	Not Applicable	0	44	Not Available
yes	TCGA-DD-AAE0	555	Alive	T3a	N0	M0	Stage IIIA	G4																					Mild	45	3.8	4.8	5.3	TCGA-DD-AAE0	5E4136E4-DDD8-4FAF-8A8E-5F836FD97F49	0.2	0.9	Not Available	A	0.7	1.5	0.5	14	-16732	Not Applicable	0	300	Not Available
yes	TCGA-DD-A4NI	816	Alive	T2	NX	M0	Stage II	G2																					Unknown	67	3.5	4.4	5	TCGA-DD-A4NI	518AA9CC-71CF-4734-9D55-B435DA99D300	0.1	0.6	6	A	0.8	1.3	1.1	29	-24516	Not Applicable	0	328	Not Available
yes	TCGA-DD-AADA	1233	Alive	T1	N0	M0	Stage I	G3																					Unknown	66	3.8	4.1	5.3	TCGA-DD-AADA	E50EDBA1-8EC4-47E7-A01E-9F1B2CD75FD7	0.2	0.5	Not Available	A	0.7	1.5	0.6	7	-24288	Not Applicable	0	930	Not Available
yes	TCGA-G3-A3CI	180	Alive	T1	N0	M0	Stage I	G2																					Mild	71	0.3	0.4	0.5	TCGA-G3-A3CI	B5465221-78FE-40A8-ABEC-BED600602DD4	0	0.3	Not Available	A	0.6	1.4	0.9	16	-26224	Not Applicable	0	180	Not Available
no	TCGA-T1-A6J8	23	Alive	T1	NX	M0		G2																					Not Available	68	Not Available	Not Available	Not Available	TCGA-T1-A6J8	59F163D2-6A7C-41B8-B4D6-F07174DAFC6E	Not Available	Not Available	Not Available	Not Available	Not Available	Not Available	Not Available	12	-24853	Not Applicable	0	23	Not Available
yes	TCGA-DD-A1EJ	1005	Dead	T1	N1	M0	Stage IIIC	G2		NO						TCGA-DD-A1EJ-A42216	CB81B953-600C-4EA2-A887-9AC76DF2AC04	15	YES	277;300;424;495;760	Not Available;Not Available;Other;Other;Other	Not Applicable;Not Applicable;Doxorubicin/mitomycin;Doxorubicin/mitomycin;chemoembolic mixture	Radioembolization;Radioembolization;Chemoembolization;Chemoembolization;Chemoembolization	Y-90 Therasphere;Y-90 Therasphere;Not Available;Not Available;Not Available	Not Applicable;Not Applicable;Not Applicable;Not Applicable;Not Applicable	4	2013		Mild	71	3.2	3.5	5	TCGA-DD-A1EJ	52292ffc-0902-4d97-b461-20723987a177	0.1	0.7	1	B	0.6	1.1	0.6	10	-26009	Not Applicable	0	887	Not Available
yes	TCGA-DD-A4NF	942	Alive	T1	N0	M0	Stage I	G2																					Mild	72	3.5	4	5	TCGA-DD-A4NF	1043BC90-72C9-48C9-AE24-F617D0485E78	0.1	0.5	Not Available	A	0.8	1.3	0.9	29	-26330	Not Applicable	0	428	Not Available
yes	TCGA-DD-AACY	1450	Alive	T1	N0	M0	Stage I	G3		YES	Radiofrequency Ablation;Radiofrequency Ablation	Not Applicable;Not Applicable	845;1161	2;1	2;1	TCGA-DD-AACY-A66127	0745DCEF-5CAE-438E-8619-E0D0820BDD76	2	YES	407;Not Available	Other;Not Available	adriamycin;Not Applicable	Chemoembolization;Not Available	Other, specify;Not Available	lipidol;Not Applicable	10	2014		Mild	61	3.8	3.1	5.3	TCGA-DD-AACY	D884561B-5828-4C47-ACD7-3F02E181B596	0.2	1.3	Not Available	A	0.7	1.5	0.6	29	-22332	Not Applicable	0	1140	Not Available
yes	TCGA-DD-AAEK	1067	Alive	T2	N0	M0	Stage II	G3																					None	51	3.8	4.1	5.3	TCGA-DD-AAEK	6EA0EF82-694D-492D-95DA-A3BC8DE99149	0.2	1	Not Available	A	0.7	1.5	0.7	15	-18757	Not Applicable	0	1067	Not Available
yes	TCGA-DD-AAE1	552	Alive	T1	N0	M0	Stage I	G3																					Mild	52	3.8	4.1	5.3	TCGA-DD-AAE1	3BBFF405-DAE4-4DC9-985A-33E7AC9CB2DD	0.2	0.4	Not Available	A	0.7	1.5	0.8	14	-19073	Not Applicable	0	293	Not Available
yes	TCGA-DD-A4NA	1008	Alive	T2	N1	M0	Stage IIIC	G3																					None	67	Not Available	Not Available	Not Available	TCGA-DD-A4NA	BEE9D6C8-948F-4B76-97CA-B985064249EF	Not Available	Not Available	2	Unknown	0.6	1.1	0.8	21	-24603	Not Applicable	0	1008	Not Available
yes	TCGA-QA-A7B7	94	Alive	T2	NX	MX	Stage II	G2																					Mild	48	3.5	4.2	4.8	TCGA-QA-A7B7	B0952FD6-62EE-44EF-9A2A-E5262ED4721A	0.3	1	Not Available	A	0.7	1.2	1	23	-17636	Not Applicable	0	62	Not Available
no	TCGA-2Y-A9H8	633	Dead	T1	NX	MX		G2																					Unknown	85	3.5	4.2	5	TCGA-2Y-A9H8	3528DD91-1A6D-4D41-A3EE-829C857CC904	0.2	0.3	2	Unknown	0.8	1.5	0.6	3	-31322	633	0	Not Available	Not Available
no	TCGA-DD-A4NJ	928	Alive	T2	N0	M0	Stage II	G2		YES	Radiofrequency Ablation	Not Applicable	577	Not Available	1	TCGA-DD-A4NJ-A49652	138B9C68-C27D-4F7F-9EA2-D034888BDB34	7	NO	Not Available	Not Available	Not Applicable	Not Available	Not Available	Not Applicable	10	2013		Mild	54	3.5	4.7	5	TCGA-DD-A4NJ	815DFFB0-0C22-4E05-868C-26E6C553980A	0.1	0.4	1	A	0.6	1.1	0.7	5	-19964	Not Applicable	0	458	Not Available
yes	TCGA-NI-A4U2	1791	Dead	T3	NX	MX	Stage IIIA	G1																					None	71	Not Available	Not Available	Not Available	TCGA-NI-A4U2	9AEA3437-572A-48C6-BEB9-9BDBCB243875	Not Available	Not Available	3	Unknown	Not Available	Not Available	0.8	28	-26011	1791	0	Not Available	Not Available
yes	TCGA-DD-A118	3437	Alive	T2	N0	M0	Stage II	G2																					None	77	3.4	3.4	4.8	TCGA-DD-A118	7d914d07-f250-4c7a-8fa2-df14e708936e	0.1	0.5	Not Available	A	0.7	1.2	0.9	29	-28406	Not Applicable	0	693	Not Available
yes	TCGA-KR-A7K0	65	Dead	T1	N0	M0	Stage I	G1																					Not Available	65	3.5	2.8	4.9	TCGA-KR-A7K0	5A7706BA-3CEA-41EB-B78A-FD69206DAA93	0.2	1.3	Not Available	Unknown	0.7	1.3	0.7	28	-23974	65	0	Not Available	Not Available
yes	TCGA-BC-A10R	308	Dead	T3	NX	MX		G2		NO						TCGA-BC-A10R-A13748	7DC35BE0-5FF4-4075-ADBC-348F148D5887	4	YES	237	Not Available	Not Applicable	Chemoembolization	Not Available	Not Applicable	4	2011		Mild	66	Not Available	4	Not Available	TCGA-BC-A10R	0bf5bbd4-d9e8-42a6-9ab5-f2c174dec12c	Not Available	Not Available	1	Not Available	0.7	1.1	0.7	23	-24274	308	0	Not Available	Not Available
yes	TCGA-K7-A5RF	631	Alive	T1	NX	MX	Stage I	G1		NO						TCGA-K7-A5RF-A63821	CFA73AF8-20C4-43EC-B5EA-C17F5563D3B2	19	YES	240;275	Doxorubicin;Doxorubicin	Not Applicable;Not Applicable	Chemoembolization;Chemoembolization	Plastic Beads;Plastic Beads	Not Applicable;Not Applicable	8	2014		Not Available	64	Not Available	Not Available	Not Available	TCGA-K7-A5RF	3134F7D1-3359-497A-B8BE-1F317D8DDAAA	Not Available	Not Available	Not Available	Unknown	Not Available	Not Available	Not Available	24	-23557	Not Applicable	0	240	Not Available
yes	TCGA-G3-A5SK	744	Alive	T1	NX	M0	Stage I	G1		YES	Radiofrequency Ablation	Not Applicable	575	1	1	TCGA-G3-A5SK-A62746	9B6947A8-DE71-4F9B-B433-2C88224A8374	24	YES	671	Doxorubicin	Not Applicable	Chemoembolization	Plastic Beads	Not Applicable	7	2014		Mild	58	3.3	3.3	4.8	TCGA-G3-A5SK	24259D55-20AC-4359-861F-DCAD7AD88CEE	Not Available	Not Available	Not Available	A	0.6	1.4	0.6	15	-21320	Not Applicable	0	302	Not Available
yes	TCGA-DD-AADK	1049	Alive	T2	N0	M0	Stage II	G3																					None	68	3.8	4.4	5.3	TCGA-DD-AADK	40F30FFB-51DE-4786-A88F-16C170AAC207	0.2	0.5	Not Available	A	0.7	1.5	1.2	14	-25046	Not Applicable	0	734	Not Available
yes	TCGA-2Y-A9GV	2532	Dead	T1	NX	MX	Stage I	G1																					Unknown	54	3.5	4.2	5	TCGA-2Y-A9GV	D1AA9C1A-D732-48C0-B669-8A14E0397344	0.2	0.3	Not Available	Unknown	0.8	1.5	0.6	3	-20011	2532	0	Not Available	Not Available
yes	TCGA-RC-A7S9	640	Alive	T1	N0	M0	Stage I	G3																					Mild	47	3.1	4.3	5.2	TCGA-RC-A7S9	F5DE6712-4DE4-43DE-8EB5-EC2A798C8438	0.1	0.8	Not Available	A	0.3	1.2	0.7	21	-17403	Not Applicable	0	640	Not Available
yes	TCGA-DD-A39W	827	Dead	T3	N0	M0	Stage III	G2																					Not Available	29	Not Available	Not Available	Not Available	TCGA-DD-A39W	48D33449-B969-423A-B4E7-541809109617	Not Available	Not Available	Not Available	Not Available	Not Available	Not Available	Not Available	5	-10699	827	0	Not Available	Not Available
yes	TCGA-DD-AACJ	2102	Alive	T2	N0	M0	Stage II	G2																					Not Available	75	3.8	3.6	5.3	TCGA-DD-AACJ	93AFBFA1-4D03-4105-8DDA-B095F0AB308A	0.2	1	Not Available	A	0.7	1.5	1	15	-27528	Not Applicable	0	1828	Not Available
yes	TCGA-G3-AAUZ	480	Alive	T1	N0	M0	Stage I	G2																					Severe	48	3.3	3.8	4.8	TCGA-G3-AAUZ	D74DDBE2-5860-40B1-9BD8-99CC50F3392D	0	0.3	Not Available	A	0.6	1.4	0.8	14	-17760	Not Applicable	0	342	Not Available
yes	TCGA-DD-AAW2	1855	Alive	T1	N0	M0	Stage I	G2																					None	69	3.3	4	5.2	TCGA-DD-AAW2	03DF105E-A005-4577-BFDB-9644758D778E	0.2	0.4	1	A	0.7	1.4	1.1	13	-25420	Not Applicable	0	1505	Not Available
yes	TCGA-DD-AACQ	432	Dead	T2	N0	M0	Stage II	G3																					Unknown	50	3.8	4.2	5.3	TCGA-DD-AACQ	0F34D654-8984-4B8B-B345-67066D611513	0.2	0.8	Not Available	A	0.7	1.5	1.3	29	-18429	Not Applicable	0	429	Not Available
yes	TCGA-LG-A9QC	425	Alive	T1	NX	M0	Stage I	G2																					Mild	48	3.5	4.7	5	TCGA-LG-A9QC	8C2783EF-AA41-44C9-BE87-FA4C84108F1E	0.2	2.8	1	Unknown	0.5	1.3	0.8	7	-17842	Not Applicable	0	180	Not Available
yes	TCGA-DD-AACL	107	Dead	T1	N0	M0	Stage I	G3																					Unknown	66	3.8	3.3	5.3	TCGA-DD-AACL	3DA3CFEC-5464-4DD8-9757-A0CDFE3536F8	0.2	0.7	Not Available	A	0.7	1.5	1	29	-24355	Not Applicable	0	58	Not Available
no	TCGA-WQ-A9G7	30	Alive	T3a	NX	M0		G3																					Unknown	71	3.5	3.5	5	TCGA-WQ-A9G7	491A3734-DCB8-4779-B098-0B5567F13F87	0.3	0.7	Not Available	Unknown	0.4	1	0.4	21	Not Available	Not Applicable	0	30	Not Available
yes	TCGA-G3-A5SM	520	Alive	T2	NX	M0	Stage II	G3		YES	Radiofrequency Ablation;Radiofrequency Ablation	Not Applicable;Not Applicable	302;365	1;1	1;1	TCGA-G3-A5SM-A62750	1796E529-FEBB-4E24-96C2-D4B5ACD824D7	24	NO	Not Available;Not Available	Not Available;Not Available	Not Applicable;Not Applicable	Not Available;Not Available	Not Available;Not Available	Not Applicable;Not Applicable	7	2014		Unknown	58	3.3	3.2	4.8	TCGA-G3-A5SM	D397E70F-C174-4656-9B7E-5E4C00754410	0	0.6	Not Available	A	0.5	1.4	0.5	15	-21236	Not Applicable	0	133	Not Available
yes	TCGA-XR-A8TE	925	Alive	T3	N0	MX	Stage IIIA	G1																					None	16	3.2	3.9	4.5	TCGA-XR-A8TE	EC4B4D34-2576-4412-B036-7460E64F4398	Not Available	Not Available	Not Available	Not Available	0.7	1.5	0.4	20	-5862	Not Applicable	0	925	Not Available
yes	TCGA-DD-AAEG	719	Alive	T1	N0	M0	Stage I	G3																					None	59	3.8	3	5.3	TCGA-DD-AAEG	BD627786-31A8-46D9-B3E2-7F489D50F608	0.2	0.6	Not Available	A	0.7	1.5	0.6	15	-21853	Not Applicable	0	476	Not Available
yes	TCGA-DD-A3A3	535	Dead	T1	N0	M0	Stage I	G2																					None	45	Not Available	Not Available	Not Available	TCGA-DD-A3A3	516C8594-2973-41E5-A5CE-76D177EDFA48	0.1	0.9	Not Available	B	0.8	1.2	1.2	6	-16708	535	0	Not Available	Not Available
yes	TCGA-GJ-A3OU	879	Alive	T1	NX	MX	Stage I	G2																					Unknown	59	3.5	3.2	5	TCGA-GJ-A3OU	FB2ABC2A-ECF1-4184-912F-26A649F861FF	0	0.9	1	Unknown	0.6	1.4	0.6	3	-21671	Not Applicable	0	697	Not Available
yes	TCGA-BC-A10T	837	Dead	T4	NX	MX		G1																					Not Available	76	Not Available	3	Not Available	TCGA-BC-A10T	8a9cde9a-c38c-423e-bc14-354ee26468c9	Not Available	0.7	Not Available	Not Available	Not Available	Not Available	1.2	23	-27944	837	0	Not Available	Not Available
yes	TCGA-DD-AACT	1562	Alive	T1	N0	M0	Stage I	G2																					Mild	69	3.8	4.4	5.3	TCGA-DD-AACT	3EA084C5-3783-4FDE-B341-5914D2EDB977	0.2	0.8	Not Available	A	0.7	1.5	0.7	29	-25292	Not Applicable	0	1291	Not Available
yes	TCGA-CC-A7IJ	382	Alive	T2	N0	M0	Stage II	G3																					Not Available	56	Not Available	Not Available	Not Available	TCGA-CC-A7IJ	E610A644-0504-445A-BBA1-4BAE360DE4C1	Not Available	Not Available	Not Available	Unknown	Not Available	Not Available	Not Available	22	-20751	Not Applicable	0	0	Not Available
yes	TCGA-DD-AAEE	810	Alive	T1	N0	M0	Stage I	G4		NO						TCGA-DD-AAEE-A68428	824D8AAC-0C3D-40A8-8091-A0704D0DC6DC	3	YES	383;502;551	Other;Other;Other	adriamycin;adriamycin;adriamycin	Chemoembolization;Chemoembolization;Chemoembolization	Gelfoam;Gelfoam;Gelfoam	Not Applicable;Not Applicable;Not Applicable	11	2014		None	55	3.8	4.7	5.3	TCGA-DD-AAEE	3C51FEE0-DA54-40E9-A954-DFE30F6F075C	0.2	0.8	Not Available	A	0.7	1.5	0.9	18	-20396	Not Applicable	0	498	Not Available
yes	TCGA-CC-A1HT	101	Dead	T3	N0	M0	Stage IIIA	G3																					Not Available	50	Not Available	Not Available	Not Available	TCGA-CC-A1HT	670c1cbc-4494-45f1-bb8b-18db82d4f7e0	Not Available	Not Available	Not Available	Not Available	Not Available	Not Available	Not Available	2	-18553	Not Applicable	0	0	Not Available
yes	TCGA-DD-AAVV	2455	Alive	T2	N0	M0	Stage II	G3																					Mild	56	3.3	4.6	5.2	TCGA-DD-AAVV	915F531B-8448-41C7-9DFB-9C83062B906E	0.2	0.9	Not Available	A	0	1.4	1.3	1	-20751	Not Applicable	0	2455	Not Available
yes	TCGA-DD-AADY	555	Alive	T1	N0	M0	Stage I	G2																					None	55	3.8	3.5	5.3	TCGA-DD-AADY	E42E4244-DCE8-453A-B5E0-7593A9B5AF61	0.2	0.8	Not Available	A	0.7	1.5	0.6	14	-20233	Not Applicable	0	294	Not Available
yes	TCGA-DD-A1EI	183	Alive	T1	N0	M0	Stage I	G2																					Mild	46	3.5	5.1	5	TCGA-DD-A1EI	3acf7438-fd65-442c-8a30-68b6714537f3	0.1	0.7	0	B	0.8	1.3	0.9	10	-17097	Not Applicable	0	183	Not Available
yes	TCGA-DD-AAD1	564	Alive	T1	N0	M0	Stage I	G4																					Unknown	51	3.8	4.5	5.3	TCGA-DD-AAD1	1F482810-433A-4D46-B81B-F7909FFF8C09	0.2	0.6	Not Available	A	0.7	1.5	0.5	29	-18794	Not Applicable	0	564	Not Available
yes	TCGA-DD-A4NO	2245	Alive	T1	N0	M0	Stage I	G1		YES	Radiofrequency Ablation;Other	Not Applicable;cryoablation	2244;2244	1;1	1;1	TCGA-DD-A4NO-A49664	229D0F16-E4C6-4694-8F51-BA228820B968	7	YES	1051;Not Available	Other;Not Available	embolic agent;Not Applicable	Chemoembolization;Not Available	Other, specify;Not Available	embolic agent;Not Applicable	10	2013		Mild	65	3.5	4.5	5	TCGA-DD-A4NO	75F78C38-6854-4390-AD11-789B4E549D63	0.1	0.4	Not Available	A	0.8	1.3	1.6	5	-24090	Not Applicable	0	1869	Not Available
yes	TCGA-DD-A3A2	2131	Dead	T1	N0	M0	Stage I	G1																					None	76	3.5	4.2	5	TCGA-DD-A3A2	357C1C08-F368-4CAE-8F20-9BE241B30479	0.1	0.5	Not Available	A	0.6	0.9	0.8	5	-27930	2131	0	Not Available	Not Available
yes	TCGA-2Y-A9H9	697	Alive	T1	N0	MX	Stage I	G2		NO						TCGA-2Y-A9H9-A67255	36E9FF5F-3F7D-48FC-B27F-3D2A7718C96B	3	YES	281;400;434	Doxorubicin;Other;Other	Not Applicable;Unknown;lipiodol/doxyrubicin	Chemoembolization;Chemoembolization;Chemoembolization	Other, specify;Other, specify;Other, specify	LC Beads;Unknown;embospheres	11	2014		None	70	3.5	4.7	5	TCGA-2Y-A9H9	EFC3E5E4-0D8E-4BEF-A259-29F8ED21684F	0.2	0.6	2	A	0.8	1.2	0.8	3	-25670	Not Applicable	0	456	Not Available
yes	TCGA-ZS-A9CG	341	Alive	T2	NX	MX	Stage II	G2																					Mild	55	35	40	50	TCGA-ZS-A9CG	3F6A6891-C6D5-447B-AD32-325FD46EC32B	0	5	Not Available	A	62	106	72	30	-20100	Not Applicable	0	250	Not Available
yes	TCGA-DD-AAVU	2202	Alive	T2	N0	M0	Stage II	G2																					Mild	46	3.3	4.6	5.2	TCGA-DD-AAVU	146C5332-1AF5-4C49-B740-9A9EDC795F24	0.2	0.6	Not Available	A	0	1.4	1.2	13	-16889	Not Applicable	0	1882	Not Available
yes	TCGA-DD-A11B	14	Dead	T1	N0	M0	Stage I	G2																					Mild	73	3.5	3.9	5	TCGA-DD-A11B	1b1b1af0-b19b-4086-b1b7-669fa0b88235	0.1	1.6	Not Available	A	0.9	1.4	1	29	-26857	14	0	Not Available	Not Available
yes	TCGA-DD-AADF	115	Dead	T1	N0	M0	Stage I	G4																					Unknown	64	3.8	3.5	5.3	TCGA-DD-AADF	70BB26B8-B38B-4E79-90E7-033A38405B00	0.2	1.1	Not Available	A	0.7	1.5	0.6	7	-23614	115	0	Not Available	Not Available
yes	TCGA-ZS-A9CE	1241	Alive	T2	NX	MX	Stage II	G1																					None	79	36	44	50	TCGA-ZS-A9CE	7BDC5F86-4D7D-4F1F-BC23-AB51FA9FB947	0	5	Not Available	A	44	80	78	30	-29051	Not Applicable	0	1066	Not Available
yes	TCGA-RC-A7SK	472	Alive	T1	N0	M0	Stage I	G3																					None	59	3.1	4.3	5.2	TCGA-RC-A7SK	ACFD58EB-C546-49C3-A846-684F22428219	0.1	0.6	Not Available	A	0.3	1.2	1	21	-21814	Not Applicable	0	472	Not Available
yes	TCGA-2Y-A9H1	1229	Dead	T1	NX	MX	Stage I	G2		NO						TCGA-2Y-A9H1-A66956	6FF2F78D-C736-4E2F-A197-E82382551E44	28	YES	178	Not Available	Not Applicable	Radioembolization	Y-90 Therasphere	Not Applicable	10	2014		Unknown	58	3.5	4.4	5	TCGA-2Y-A9H1	9C5E2438-F587-4935-92F0-4BFD57468EAA	0.2	0.5	Not Available	Unknown	0.8	1.5	0.9	3	-21222	1229	0	Not Available	Not Available
yes	TCGA-DD-A39Y	171	Dead	T1	NX	M0	Stage I	G3																					None	67	3.5	4	5	TCGA-DD-A39Y	BED1D731-E382-4B80-9604-E6DD68D9C0AB	0.1	1.1	Not Available	A	1.2	12	0.8	5	-24769	171	0	Not Available	Not Available
yes	TCGA-ES-A2HS	688	Dead	T1	NX	MX	Stage I	G2																					Mild	80	3.5	3.8	5	TCGA-ES-A2HS	728AEDB3-551A-4C16-9BE3-7733A9539E9E	0	1.9	0	A	0.8	1.2	0.6	28	-29268	688	0	Not Available	Not Available
yes	TCGA-DD-AAVY	1970	Alive	T3	N0	M0	Stage IIIA	G2																					None	56	3.3	3	5.2	TCGA-DD-AAVY	C36F9FFE-515B-4895-B82A-AADC49FE3016	0.2	1	2	A	0.7	1.4	1.2	13	-20709	Not Applicable	0	1788	Not Available
yes	TCGA-RC-A7SF	579	Alive	T1	N0	M0	Stage I	G2																					None	66	3.1	4.4	5.2	TCGA-RC-A7SF	714A6878-ED2A-47F3-9755-B705AC144D68	0.1	0.8	Not Available	A	0.3	1.2	1	21	-24432	Not Applicable	0	579	Not Available
yes	TCGA-DD-A114	1149	Dead	T2		M0	Stage II	G3																					Mild	42	3.5	3.5	5	TCGA-DD-A114	02931491-f56b-4233-a079-812e08bc0c59	0.1	2.5	Not Available	A	0.9	1.4	1.2	29	-15410	1149	0	Not Available	Not Available
yes	TCGA-CC-5262	103	Dead	T4	N0	M0	Stage IIIC	G1																					Not Available	67	Not Available	Not Available	Not Available	TCGA-CC-5262	1b428ada-eb3f-40c2-b4bf-1bbf6b61729d	Not Available	Not Available	Not Available	Not Available	Not Available	Not Available	Not Available	2	-24787	Not Applicable	0	0	Not Available
yes	TCGA-WX-AA44	615	Alive	T1	NX	MX	Stage I	G3		NO						TCGA-WX-AA44-A70655	895DE754-2102-438F-9A1D-E4A8443D0344	2	YES	274	Not Available	Not Applicable	Radioembolization	Y-90 Sirsphere	Not Applicable	3	2012		None	64	3.5	4.4	5	TCGA-WX-AA44	5436FAFB-BC16-4450-AC8B-568E1E5EE5FE	0	0.5	Not Available	A	0.5	1.2	0.6	21	-23654	Not Applicable	0	473	Not Available
no	TCGA-FV-A3R3	366	Dead	T1	NX	MX	Stage I	G2																					Not Available	38	3.4	2	5	TCGA-FV-A3R3	3DD7C93D-8194-44EE-8014-10DD81EF6441	0	0.4	Not Available	Not Available	0.6	1.3	1.3	25	-14231	Not Applicable	0	4	Not Available
yes	TCGA-DD-A4NS	2456	Dead	T1	N0	M0	Stage I	G2																					None	61	Not Available	Not Available	Not Available	TCGA-DD-A4NS	A6A3F07C-CED4-451B-B2E5-C93E4ED622C1	0.1	0.9	2	Unknown	0.7	1.2	1.1	11	-22638	2456	0	Not Available	Not Available
yes	TCGA-DD-A3A9	931	Dead	T4	N0	M1	Stage IVB	G2																					None	64	3.5	4	5	TCGA-DD-A3A9	457CCA7C-A8B4-414E-A3C0-7FCCF0EE2034	0.1	0.3	Not Available	A	0.6	0.9	0.9	5	-23526	931	0	Not Available	Not Available
yes	TCGA-BC-A10Y	711	Dead	T4	NX	MX		G3		YES	Radiofrequency Ablation	Not Applicable	0	2	1	TCGA-BC-A10Y-A13752	7B52CE23-0D78-4CD7-BE6D-BD49B670EBE2	4	YES	420;470;527	Other;Other;Other	Doxorubicin and Mitomycin C;Doxorubicin and Mitomycin C;Doxorubicin and Mitomycin C	Chemoembolization;Chemoembolization;Chemoembolization	Other, specify;Other, specify;Other, specify	Embosphere/gelfoam;Embosphere/gelfoam;spherical PVA/gelfoam	4	2011		None	76	3.5	4	5	TCGA-BC-A10Y	6533648f-1353-4253-b65b-d472aacf5751	0	0.5	Not Available	Not Available	0.9	1.4	1	31	-28049	711	0	Not Available	Not Available
yes	TCGA-DD-AAEA	575	Alive	T1	N0	M0	Stage I	G3																					Unknown	65	3.8	4.5	5.3	TCGA-DD-AAEA	AD9657AA-34E9-48B1-BA63-916FE7BD14BB	0.2	0.6	Not Available	A	0.7	1.5	0.9	14	-24027	Not Applicable	0	450	Not Available
yes	TCGA-UB-AA0V	314	Alive		NX	MX	Stage I	G1																					Mild	69	3.5	3.8	4.8	TCGA-UB-AA0V	EA214F79-0F6B-403F-8693-C844BF4B77CB	0.2	1	1	A	0.5	1	0.7	16	-25340	Not Applicable	0	139	Not Available
yes	TCGA-FV-A3R2	194	Dead	T1	NX	MX	Stage I	Not Available																					Not Available	75	Not Available	Not Available	Not Available	TCGA-FV-A3R2	17833039-0D7E-47F0-90E6-8CABAE94C124	Not Available	Not Available	4	Not Available	Not Available	Not Available	Not Available	24	-27530	194	0	Not Available	Not Available
yes	TCGA-XR-A8TF	693	Dead	T1	NX	MX	Stage I	G1																					None	74	3.5	3.9	4.8	TCGA-XR-A8TF	1E9F910C-82C0-4222-A62F-B656839307FC	0.2	0.8	Not Available	A	0.7	1.5	0.8	20	-27145	693	0	Not Available	Not Available
yes	TCGA-DD-AAVP	2752	Alive	T1	N0	M0	Stage I	G1																					Severe	48	3.3	4.3	5	TCGA-DD-AAVP	0004D251-3F70-4395-B175-C94C2F5B1B81	0.2	1.1	1	A	0.7	1.4	1.2	13	-17833	Not Applicable	0	2405	Not Available
yes	TCGA-LG-A6GG	387	Alive	T2	NX	M0	Stage II	G2																					None	79	3.4	3.7	4.8	TCGA-LG-A6GG	C618DA6D-3C66-4A6A-8832-3526A3B75410	0.2	0.8	Not Available	A	0.4	1.1	0.6	25	-28871	Not Applicable	0	15	Not Available
yes	TCGA-MI-A75E	507	Alive	T4	N0	M0	Stage IIIC	G2																					Not Available	61	3.5	3	4.9	TCGA-MI-A75E	010D5817-9A3F-4A06-8643-653116C044FF	0.2	1.1	1	A	0.6	1.3	Not Available	19	-22457	Not Applicable	0	155	Not Available
yes	TCGA-DD-AACG	469	Dead	T2	N0	M0	Stage II	G4																					Mild	52	3.8	3.6	5.3	TCGA-DD-AACG	B5BEF77A-F46C-406C-9AA8-55F7A61AA885	0.2	1	Not Available	A	0.7	1.5	1.5	28	-19174	469	0	Not Available	Not Available
yes	TCGA-CC-A123	219	Alive	T3	N0	M0	Stage IIIA	G1																					Not Available	24	Not Available	Not Available	Not Available	TCGA-CC-A123	e2f6d3aa-b817-4193-a550-8e53265aa336	Not Available	Not Available	Not Available	Not Available	Not Available	Not Available	Not Available	18	-9107	Not Applicable	0	-8	Not Available
yes	TCGA-2Y-A9H3	1516	Alive	T2	NX	MX	Stage II	G1		NO						TCGA-2Y-A9H3-A66938	27ADBB25-B09A-416B-AA11-22851BE807AA	28	YES	42	Not Available	Not Applicable	Radioembolization	Y-90 Therasphere	Not Applicable	10	2014		None	45	3.5	5.3	5	TCGA-2Y-A9H3	9B69D7F9-38EB-48E1-BDC0-A092A53BC709	0.2	0.3	3	Unknown	0.8	1.5	0.9	3	-16443	Not Applicable	0	1257	Not Available
yes	TCGA-CC-A3MC	363	Alive	T3	N0	M0	Stage IIIA	G2																					Not Available	54	Not Available	Not Available	Not Available	TCGA-CC-A3MC	0277F393-3743-47D6-A96F-155BAEC9EB49	Not Available	Not Available	Not Available	Not Available	Not Available	Not Available	Not Available	6	-20067	Not Applicable	0	4	Not Available
yes	TCGA-ES-A2HT	438	Dead	T1	NX	MX	Stage I	G2																					Mild	54	3.5	4.1	5	TCGA-ES-A2HT	7DD3BDA9-3A0A-46FA-B052-A6D24B847804	0	0.6	0	A	0.8	1.2	0.7	30	-20023	438	0	Not Available	Not Available
yes	TCGA-DD-AADC	425	Dead	T1	N0	M0	Stage I	G3																					Unknown	53	3.8	3.8	5.3	TCGA-DD-AADC	4100FD8B-CF37-4E63-A73D-95C9C392D606	0.2	0.7	Not Available	A	0.7	1.5	0.8	7	-19527	425	0	Not Available	Not Available
yes	TCGA-2Y-A9HA	36	Dead	T2	NX	MX	Stage II	G2		NO						TCGA-2Y-A9HA-A67272	52861D38-28FF-4D51-989C-88D2270EF75C	3	YES	0	Not Available	Not Applicable	Radioembolization	Other, specify	Habib	11	2014		None	70	3.5	3.5	5	TCGA-2Y-A9HA	A25A714E-C142-482B-91C8-4FEA763E0254	0.2	0.6	Not Available	A	0.8	1.5	0.8	3	-25892	36	0	Not Available	Not Available
yes	TCGA-CC-A3MA	303	Dead	T3	N0	M0	Stage IIIA	G2																					Not Available	61	Not Available	Not Available	Not Available	TCGA-CC-A3MA	613DDB95-14D7-4941-B374-FB5CD344D1BB	Not Available	Not Available	Not Available	Not Available	Not Available	Not Available	Not Available	6	-22375	Not Applicable	0	2	Not Available
no	TCGA-DD-A1E9	2759	Dead	T1	N0	M0	Stage I	G2		YES	Radiofrequency Ablation	Not Applicable	1839	Not Available	1	TCGA-DD-A1E9-A42014	487D20F2-3074-4B10-93BF-D379E4A91665	9	YES	1924	Other	chemoembolic mixture	Chemoembolization	Other, specify	chemoembolic mixture	4	2013		Severe	70	3.5	4.1	5	TCGA-DD-A1E9	8153a862-0790-4a33-80db-ed47fedcd4ef	0.1	13	4	A	0.8	1.3	0.9	10	-25808	2759	0	Not Available	Not Available
no	TCGA-ZP-A9CY	782	Alive	T1	NX	MX		G1																					Mild	66	3.5	3.9	5.2	TCGA-ZP-A9CY	34FD27CE-930A-4F29-8A6E-DAE4949D92EB	0.2	0.9	1	A	Not Available	Not Available	Not Available	28	-24223	Not Applicable	0	782	Not Available
no	TCGA-HP-A5N0	752	Dead	TX	NX	M0		Not Available																					None	90	3.5	2.6	4.8	TCGA-HP-A5N0	7F8E25D4-6021-4327-96AB-79B6FCC97A24	Not Available	Not Available	3	Unknown	0	0.9	0.5	30	-32120	752	0	Not Available	Not Available
yes	TCGA-DD-A11D	1560	Dead	T1	N0	M0	Stage I	G2		NO						TCGA-DD-A11D-A43743	1BD30F5B-B70D-4E68-8C90-E6658939E2A4	2	YES	1506	Other	Y90 Theraspheres	Radioembolization	Y-90 Therasphere	Not Applicable	6	2013		None	57	3.5	4.5	5	TCGA-DD-A11D	0ef95351-0133-4f34-a59c-90934fb161f8	0.1	0.5	2	A	0.6	1.1	1.1	29	-21003	1560	0	Not Available	Not Available
yes	TCGA-ZS-A9CF	2412	Alive	T2	NX	MX	Stage II	G2																					None	64	36	51	50	TCGA-ZS-A9CF	7FE5E2D9-C514-47BC-8387-3F940F7A822D	0	19	Not Available	Unknown	62	106	89	1	-23510	Not Applicable	0	2258	Not Available
yes	TCGA-3K-AAZ8	396	Alive	T3b	NX	MX	Stage IIIB	G1																					Not Available	65	Not Available	Not Available	Not Available	TCGA-3K-AAZ8	94E387AE-B641-4E9F-BB53-22C7B2A9CCCB	Not Available	Not Available	Not Available	Not Available	Not Available	Not Available	Not Available	25	-24046	Not Applicable	0	243	Not Available
yes	TCGA-FV-A3I1	247	Dead	T2	N0	MX	Stage II	G2																					Not Available	81	Not Available	Not Available	Not Available	TCGA-FV-A3I1	BFD20D71-18A5-4F01-8D56-84378AD92359	Not Available	Not Available	Not Available	Not Available	Not Available	Not Available	Not Available	16	Not Available	Not Applicable	0	0	Not Available
yes	TCGA-DD-A73G	3478	Alive	T1	N0	M0	Stage I	G3																					None	73	3.5	3.2	5	TCGA-DD-A73G	4774367C-5D8F-4B23-934A-E6D33A89DCA8	0.1	0.5	1	A	0.7	1.2	0.7	1	-26949	Not Applicable	0	3071	Not Available
yes	TCGA-CC-A8HT	140	Dead	T3	N0	M0	Stage IIIA	G2																					Not Available	74	Not Available	Not Available	Not Available	TCGA-CC-A8HT	95408571-9D4E-412B-8EE8-7992E0270B0F	Not Available	Not Available	Not Available	Unknown	Not Available	Not Available	Not Available	22	-27334	Not Applicable	0	0	Not Available
yes	TCGA-BC-4073	849	Alive	T3	N0	MX	Stage IIIA	G3																					Not Available	73	Not Available	Not Available	Not Available	TCGA-BC-4073	00f209c3-041a-4c6e-8b0f-6383eb3c85fc	0	0.7	3	Not Available	0.7	1.3	1.5	20	-26795	Not Applicable	0	352	Not Available
yes	TCGA-BC-A216	1351	Alive	T3	NX	M0	Stage IIIA	G2																					Mild	62	3.5	3.4	5	TCGA-BC-A216	4bbdbe77-f3cb-4b64-9826-72debb734784	0	0.6	2	Not Available	0.5	1.5	0.9	8	-22968	Not Applicable	0	1144	Not Available
yes	TCGA-EP-A2KA	627	Dead	T3a	NX	MX	Stage IIIA	G3																					Not Available	52	Not Available	Not Available	Not Available	TCGA-EP-A2KA	440375D7-CDCD-418A-8992-0A8CA42D290D	Not Available	Not Available	2	Not Available	Not Available	1	0.7	18	-19214	Not Applicable	0	111	Not Available
yes	TCGA-G3-A5SI	768	Dead	T2	N0	M0	Stage II	G2		NO						TCGA-G3-A5SI-A42749	79DD2140-0ABD-4E38-86EB-5D34A1015117	30	YES	370;435;447	Doxorubicin;Doxorubicin;Doxorubicin	Not Applicable;Not Applicable;Not Applicable	Chemoembolization;Chemoembolization;Chemoembolization	Plastic Beads;Plastic Beads;Plastic Beads	Not Applicable;Not Applicable;Not Applicable	4	2013		Mild	44	3.3	2.8	4.8	TCGA-G3-A5SI	14201DA5-4446-47BE-AF72-120B7780C6BF	0	0.7	Not Available	A	0.6	1.4	0.4	15	-16126	Not Applicable	0	447	Not Available
yes	TCGA-BC-A8YO	562	Alive	T4	N0	M0	Stage IIIC	G3																					None	66	3.5	4.3	5	TCGA-BC-A8YO	F53A70D9-A774-4969-896E-2DCDD4D02A7A	0	0.3	3	Unknown	0.6	1	0.8	10	-24189	Not Applicable	0	227	Not Available
yes	TCGA-DD-AACX	170	Alive	T2	N0	M0	Stage II	G3																					Mild	66	3.8	4.2	5.3	TCGA-DD-AACX	431A72E1-EA03-4E40-89C4-2F02D454C897	0.2	0.5	Not Available	A	0.7	1.5	0.8	29	-24329	Not Applicable	0	170	Not Available
yes	TCGA-DD-A4NR	9	Dead	T1	N0	M0	Stage I	G3																					Unknown	85	3.5	3.1	5	TCGA-DD-A4NR	52A7F734-DA07-49C5-861D-C70DA37FF959	0.1	0.8	1	A	0.7	1.2	1	11	-31386	9	0	Not Available	Not Available
no	TCGA-ZP-A9D2	765	Dead	T2	NX	MX		G2																					Mild	51	Not Available	Not Available	Not Available	TCGA-ZP-A9D2	CBB89556-D783-4E70-8DB4-EF53E9A45922	Not Available	Not Available	1	A	Not Available	Not Available	Not Available	28	-18717	Not Applicable	0	743	Not Available
yes	TCGA-DD-AAEI	1531	Alive	T1	N0	M0	Stage I	G2		YES	Radiofrequency Ablation	Not Applicable	1352	1	1	TCGA-DD-AAEI-A66239	CA6D87A8-4CDC-47EC-80E3-E3F46B605C09	6	NO	Not Available	Not Available	Not Applicable	Not Available	Not Available	Not Applicable	10	2014		None	72	3.8	3.6	5.3	TCGA-DD-AAEI	34416BE6-B6D6-4029-B899-9BA685E39590	0.2	0.5	Not Available	A	0.7	1.5	0.9	15	-26465	Not Applicable	0	1233	Not Available
yes	TCGA-PD-A5DF	639	Dead	T4	N0	M0	Stage IIIB	G2																					Not Available	58	Not Available	Not Available	Not Available	TCGA-PD-A5DF	1987B453-F97D-45C7-9C89-B9A33313D645	Not Available	Not Available	Not Available	Unknown	Not Available	Not Available	Not Available	30	-21414	639	0	Not Available	Not Available
yes	TCGA-DD-A4NP	3308	Alive	T1	N0	M0	Stage I	G3		YES	Radiofrequency Ablation;Radiofrequency Ablation	Not Applicable;Not Applicable	1309;2807	1;1	1;1	TCGA-DD-A4NP-A49668	06609191-6ABF-403E-B125-A194B805FD89	7	NO	Not Available;Not Available	Not Available;Not Available	Not Applicable;Not Applicable	Not Available;Not Available	Not Available;Not Available	Not Applicable;Not Applicable	10	2013		None	32	3.5	2.4	5	TCGA-DD-A4NP	001887AA-36D0-463F-8BCA-DEC7043B4F2E	0.1	0.7	Not Available	B	0.9	1.4	1.9	5	-11838	Not Applicable	0	2849	Not Available
yes	TCGA-G3-A25Z	655	Alive	T1	N0	M0	Stage I	G2																					Mild	58	0.3	0.4	0.5	TCGA-G3-A25Z	2F3D22AD-6917-4189-89D9-2A06C2D2DE0A	0	0.9	1	A	0.6	1.4	1.1	27	-21509	Not Applicable	0	269	Not Available
yes	TCGA-BD-A3EP	409	Alive	T1	N0	M0	Stage I	G2																					Mild	75	3.4	3.8	5	TCGA-BD-A3EP	DE302B98-250D-42FE-9945-11E1B2BBD3C6	0.3	0.6	0	A	0.5	1.4	1.1	21	-27756	Not Applicable	0	409	Not Available
yes	TCGA-DD-AAVQ	2728	Alive	T1	N0	M0	Stage I	G2																					Severe	38	3.3	3	5.2	TCGA-DD-AAVQ	80E7742F-ABBE-4F11-B4E4-C999DC1BD459	0.2	1	Not Available	A	0.7	1.4	1.1	13	-13911	Not Applicable	0	2406	Not Available
yes	TCGA-G3-A25X	1779	Alive	T2	N0	M0	Stage II	G3																					Mild	73	0.3	0.4	0.5	TCGA-G3-A25X	08428220-ABD4-484E-85CA-3673454C837E	0	1.1	Not Available	A	0.4	1.4	0.8	27	-26988	Not Applicable	0	1359	Not Available
yes	TCGA-CC-A9FS	211	Alive	T2	N0	M0	Stage II	G2																					Not Available	55	Not Available	Not Available	Not Available	TCGA-CC-A9FS	F661A921-2E59-424B-A145-E22664B73728	Not Available	Not Available	Not Available	Unknown	Not Available	Not Available	Not Available	22	-20157	Not Applicable	0	0	Not Available
yes	TCGA-G3-A7M7	361	Alive	T1	NX	MX	Stage I	G1																					Severe	65	3.2	3.5	4.6	TCGA-G3-A7M7	3D048A45-3D5D-4563-ACC8-3C662861F18A	0	0.5	Not Available	A	0.7	1.2	0.6	5	-24002	Not Applicable	0	182	Not Available
yes	TCGA-ED-A8O5	406	Alive	T3a	N0	M0	Stage IIIA	G3																					Mild	59	3.8	4.2	5.1	TCGA-ED-A8O5	2BEA076B-C923-4A91-A37B-C6615FEC021C	0.1	0.4	Not Available	Unknown	4.1	5.8	3.4	12	-21648	Not Applicable	0	6	Not Available
yes	TCGA-CC-5264	102	Dead	T3	N0	M0	Stage IIIA	G2																					Not Available	71	Not Available	Not Available	Not Available	TCGA-CC-5264	61902cb6-b041-48ac-aacc-483a28949865	Not Available	Not Available	Not Available	Not Available	Not Available	Not Available	Not Available	18	-25979	Not Applicable	0	0	Not Available
yes	TCGA-DD-A4NB	989	Alive	T1	N0	M0	Stage I	G2																					Mild	25	Not Available	Not Available	Not Available	TCGA-DD-A4NB	1983FADE-44F1-41E0-8983-F2CE8D649655	0.1	1	2	Unknown	0.8	1.3	0.8	18	-9426	Not Applicable	0	391	Not Available
yes	TCGA-BD-A3ER	1115	Alive	T2	NX	MX	Stage II	G2																					Mild	62	3.4	3.9	5	TCGA-BD-A3ER	9457A9A1-3DD1-4D88-B1E1-D20AAE4491DD	0.3	0.7	0	A	0.5	1.4	0.9	21	-22657	Not Applicable	0	146	Not Available
yes	TCGA-2Y-A9H7	1168	Alive	T1	N0	MX	Stage I	G2		YES	Microwave	Not Applicable	1168	1	2	TCGA-2Y-A9H7-A69177	27B927A0-C518-45CA-9B20-9D2337439A9C	6	NO	Not Available	Not Available	Not Applicable	Not Available	Not Available	Not Applicable	11	2014		None	81	3.5	3.4	5	TCGA-2Y-A9H7	18602EC8-AED1-4515-B0D1-0DB6D1CBB2C4	0.2	0.3	Not Available	A	0.8	1.5	1.2	3	-29752	Not Applicable	0	1133	Not Available
yes	TCGA-UB-A7MB	601	Alive	T2	NX	MX	Stage II	G3		NO;YES	Radiofrequency Ablation	Not Applicable	365	1	1	TCGA-UB-A7MB-A69955;TCGA-UB-A7MB-A63685	3A2D60D6-5CD4-43E6-957D-F2B0EF1EC49F;0F7DA27F-5C06-479C-B6BD-1CD6AA8A6B65	22;15	YES;YES	390;428;85;112;390;417	Mitomycin C;Doxorubicin;Doxorubicin;Doxorubicin;Doxorubicin;Not Available	Not Applicable;Not Applicable;Not Applicable;Not Applicable;Not Applicable;Not Applicable	Chemoembolization;Chemoembolization;Chemoembolization;Chemoembolization;Chemoembolization;Radioembolization	Other, specify;Plastic Beads;Plastic Beads;Plastic Beads;Other, specify;Y-90 Therasphere	Ethiodol;Not Applicable;Not Applicable;Not Applicable;Ethiodol;Not Applicable	1;8	2014;2014		None	24	3.5	3.1	4.8	TCGA-UB-A7MB	AF1E56AF-410C-4CAD-A4E8-1C6937F1A350	0.2	0.4	Not Available	A	0.7	1.2	0.4	15	-8951	Not Applicable	0	526	Not Available
yes	TCGA-FV-A496	10	Alive	T1	NX	M0	Stage I	G2																					None	84	3.8	2.8	5	TCGA-FV-A496	8AFA3140-DCBD-44C0-AB13-4ADA6A0444D4	0.3	0.9	3	Unknown	0.9	1.1	1	21	-30950	Not Applicable	0	10	Not Available
yes	TCGA-DD-AAVS	1823	Alive	T1	N0	M0	Stage I	G2																					Mild	56	3.3	3	5.2	TCGA-DD-AAVS	9FC30C21-2C78-4843-A658-FE84A64B8FAD	0.2	1	Not Available	A	0	1.4	1	13	-20586	Not Applicable	0	1823	Not Available
yes	TCGA-DD-AACI	1618	Alive	T2	N0	M0	Stage II	G3																					Mild	69	3.8	3.6	5.3	TCGA-DD-AACI	E6FA354E-ADA7-41E0-8C8B-38520A5E6601	0.2	0.5	Not Available	A	0.7	1.5	1	28	-25236	Not Applicable	0	1618	Not Available
yes	TCGA-DD-AAVR	2513	Alive	T1	N0	M0	Stage I	G2																					None	44	3.3	3.6	5.2	TCGA-DD-AAVR	834CFF01-3C12-42FA-ABBE-AE0AE168C568	0.2	1.2	1	A	0	1.4	1.1	13	-16157	Not Applicable	0	2198	Not Available
yes	TCGA-DD-A4NV	2398	Alive	T3	N0	M0	Stage IIIA	G1																					None	61	3.5	3.9	5	TCGA-DD-A4NV	8E5CE60B-2EDA-482D-B109-210DF1321AFF	0.1	0.5	1	A	0.8	1.3	0.8	11	-22438	Not Applicable	0	2018	Not Available
yes	TCGA-G3-A3CJ	594	Alive	T2	N0	M0	Stage II	G2																					Severe	52	0.3	0.4	0.5	TCGA-G3-A3CJ	CB8F3C76-DA86-4A1D-977C-44AB399B342A	0	1	Not Available	A	0.5	1.4	0.8	17	-19305	Not Applicable	0	136	Not Available
yes	TCGA-CC-A9FU	0	Alive	T3a	N0	M0	Stage IIIA	G2																					Not Available	52	Not Available	Not Available	Not Available	TCGA-CC-A9FU	5E2A99A1-41C1-49CA-97D6-69F9B9938D24	Not Available	Not Available	Not Available	Unknown	Not Available	Not Available	Not Available	22	-19326	Not Applicable	0	0	Not Available
yes	TCGA-DD-AACN	1302	Alive	T1	N0	M0	Stage I	G3		NO						TCGA-DD-AACN-A66125	276C8689-15A0-4900-8451-29E56E7794D9	2	YES	379	Other	adriamycin	Chemoembolization	Other, specify	lipidol	10	2014		Unknown	32	3.8	3.9	5.3	TCGA-DD-AACN	0AFD4283-7311-4D69-A2F5-779628DA45FC	0.2	2.2	Not Available	A	0.7	1.5	1.5	29	-12007	Not Applicable	0	1292	Not Available
yes	TCGA-BC-A5W4	547	Dead	T3a	NX	M0	Stage IIIA	G3																					None	69	3.5	4.2	5	TCGA-BC-A5W4	6BB5D506-8FCA-43F3-90A6-03C915D7EDE2	0	0.6	Not Available	A	0.7	1.3	Not Available	20	-25503	Not Applicable	0	289	Not Available
yes	TCGA-DD-A1EG	1372	Dead	T1	N0	M0	Stage I	G3		NO						TCGA-DD-A1EG-A43855	3171B121-F52B-4493-B41C-B53451B22CD5	4	YES	1034;1070;1156;1198	Other;Other;Other;Other	TheraSpere infusion;chemoembolic mixture;chemoembolic mixture;chemoembolic mixture	Chemoembolization;Chemoembolization;Chemoembolization;Chemoembolization	Y-90 Therasphere;Not Available;Not Available;Not Available	Not Applicable;Not Applicable;Not Applicable;Not Applicable	6	2013		Mild	76	3.5	4.2	5	TCGA-DD-A1EG	6C79F64B-63FE-46F5-BF7B-77208231B0F2	0.1	0.7	1	A	0.8	1.3	0.6	9	-28108	1372	0	Not Available	Not Available
yes	TCGA-DD-AAW3	1633	Alive	T1	N0	M0	Stage I	G2																					None	69	3.3	4.1	5.2	TCGA-DD-AAW3	564B4F4D-3C18-40D5-9D95-916774DF600C	0.2	0.6	1	Not Available	0	1.4	1	13	-25254	Not Applicable	0	1451	Not Available
yes	TCGA-2Y-A9HB	260	Alive	T1	NX	MX	Stage I	G2																					None	66	3.5	3.9	5	TCGA-2Y-A9HB	B181B591-269C-4E48-B681-243D28772025	0.2	0.6	Not Available	Unknown	0.8	1.5	0.8	3	-24359	Not Applicable	0	158	Not Available
no	TCGA-DD-AAE8	664	Alive	T1	N0	M0	Stage I	G3		NO						TCGA-DD-AAE8-A68420	DBFF28C6-BF0D-4E71-B32A-E9AFF7087A66	3	YES	138	Other	adriamycin + Lipiodol	Chemoembolization	Gelfoam	Not Applicable	11	2014		Unknown	45	3.8	4.3	5.3	TCGA-DD-AAE8	B929ECE7-6CAF-4081-83D3-9923306B4A8A	0.2	3	Not Available	A	0.7	1.5	0.6	14	-16549	Not Applicable	0	344	Not Available
yes	TCGA-G3-AAV1	359	Dead	T4	N0	M0	Stage IIIC	G3		NO						TCGA-G3-AAV1-A62195	5D3B3242-0A08-41DA-BE37-6C1E9D3BE0AE	14	YES	75;231	Doxorubicin;Not Available	Not Applicable;Not Applicable	Chemoembolization;Radioembolization	Gelfoam;Y-90 Therasphere	Not Applicable;Not Applicable	7	2014		Severe	51	3.3	3.2	4.8	TCGA-G3-AAV1	EE6D81BF-0470-4652-AFF0-D85F6AB67626	0	0.7	Not Available	B	0.6	1.4	0.7	14	-18973	359	0	Not Available	Not Available
yes	TCGA-WX-AA46	756	Alive	T2	NX	MX	Stage II	G1																					None	61	3.5	4.6	5	TCGA-WX-AA46	02C41E28-CF14-42E2-9E15-F43248AE16E0	0	1.3	3	A	0.5	1.2	1.2	10	-22639	Not Applicable	0	553	Not Available
yes	TCGA-DD-AADU	554	Alive	T2	N0	M0	Stage II	G3																					None	60	3.8	4.3	5.3	TCGA-DD-AADU	CF358FB8-866C-4780-A550-D6C1C30B8C63	0.2	1.8	Not Available	A	0.7	1.5	0.8	14	-21940	Not Applicable	0	252	Not Available
yes	TCGA-XR-A8TD	1030	Alive	T3	N0	M0	Stage IIIB	G3																					None	49	3.5	3.8	4.8	TCGA-XR-A8TD	574BA00B-FEE6-4AAB-AC01-6FFAF8FDC0C5	0.2	0.7	Not Available	A	0.7	1.5	0.5	20	-17908	Not Applicable	0	1030	Not Available
yes	TCGA-DD-A1EF	394	Dead	T1	N0	M0	Stage I	G3																					Mild	57	3.5	4.5	5	TCGA-DD-A1EF	1c1e8987-676f-417b-b3b4-e0321367df55	0.1	1	9	B	0.6	1.1	0.9	10	-21165	394	0	Not Available	Not Available
yes	TCGA-G3-AAV5	354	Alive	T2	N0	M0	Stage II	G2		NO						TCGA-G3-AAV5-A62435	ACCB5A02-760D-4F04-8AF4-635EC10BB039	16	YES	-57;144	Not Available;Doxorubicin	Not Applicable;Not Applicable	Chemoembolization;Chemoembolization	Not Available;Other, specify	Not Applicable;Renegade Hi-Flo microcatheter	7	2014		Not Available	67	3.3	4.2	4.8	TCGA-G3-AAV5	4DFF4242-4A53-4F46-B200-7ED83F6B7808	0	0.4	Not Available	A	0.6	1.4	0.8	16	-24655	Not Applicable	0	266	Not Available
yes	TCGA-DD-AACP	415	Alive	T1	N0	M0	Stage I	G3																					None	64	3.8	4.1	5.3	TCGA-DD-AACP	7AD77384-0946-4FB5-9B10-BDC8A5FC8D87	0.2	1.1	Not Available	A	0.7	1.5	1.1	29	-23728	Not Applicable	0	400	Not Available
yes	TCGA-2Y-A9GW	1271	Dead	T1	N0	MX	Stage I	G2																					None	64	3.5	4.5	5	TCGA-2Y-A9GW	3E1920B3-3BD4-4506-A0CF-567257154BCF	0.2	0.6	1	Unknown	0.8	1.5	1	3	-23587	1271	0	Not Available	Not Available
yes	TCGA-2Y-A9H6	357	Alive	T1	NX	MX	Stage I	G2																					None	68	3.5	4	5	TCGA-2Y-A9H6	BC3502BC-BBF6-44F2-A1F4-D1567819AEFB	0.3	0.3	1	Unknown	0.8	1.5	1.8	3	-24982	Not Applicable	0	357	Not Available
yes	TCGA-G3-A6UC	671	Alive	T3b	N0	M0	Stage IIIB	G2																					Mild	65	3.3	4.6	4.8	TCGA-G3-A6UC	87AA894E-7676-40B7-9557-6541446D8CEA	0	1	Not Available	A	0.6	1.4	0.9	3	-23793	Not Applicable	0	236	Not Available
yes	TCGA-CC-A7IK	262	Dead	T3	N0	M0	Stage IIIA	G3																					Not Available	59	Not Available	Not Available	Not Available	TCGA-CC-A7IK	EBA5208B-404A-45DF-9133-31FF122E7FC0	Not Available	Not Available	Not Available	Unknown	Not Available	Not Available	Not Available	22	-21552	Not Applicable	0	0	Not Available
yes	TCGA-5C-A9VH	322	Alive	T1	N0	M0	Stage I	G2																					None	70	Not Available	Not Available	Not Available	TCGA-5C-A9VH	60FCD491-0170-46C0-AB14-D71F88267A14	Not Available	Not Available	Not Available	A	Not Available	Not Available	Not Available	26	-25608	Not Applicable	0	322	Not Available
yes	TCGA-RC-A7SB	588	Alive	T2	N0	M0	Stage II	G2																					None	53	3.1	4.8	5.2	TCGA-RC-A7SB	26D93D77-AB66-45AA-A162-98D091221AFB	0.1	3.7	Not Available	B	0.3	1.2	1.1	21	-19698	Not Applicable	0	588	Not Available
yes	TCGA-K7-A6G5	512	Alive	T1	N0	MX	Stage I	G2																					Not Available	66	Not Available	Not Available	Not Available	TCGA-K7-A6G5	81EDDCDA-0069-4652-9DC6-8AAC89CBA1FF	Not Available	Not Available	Not Available	Not Available	Not Available	Not Available	Not Available	12	-24233	Not Applicable	0	122	Not Available
yes	TCGA-LG-A9QD	366	Alive	T3a	N0	M0	Stage IIIA	G2																					Mild	68	3.4	2.9	4.8	TCGA-LG-A9QD	948A9BBC-60B0-4FB7-A707-76BC41294217	0	0.5	3	Unknown	0.7	1.5	0.9	7	-24969	Not Applicable	0	130	Not Available
yes	TCGA-RC-A6M4	22	Alive	T3	NX	MX	Stage IIIA	G2																					Not Available	74	3.5	2.3	4.8	TCGA-RC-A6M4	2D1DC64D-27DE-4C83-A7FA-88DA5B48BF24	0.2	0.6	2	A	0.8	1.3	0.9	9	-27327	Not Applicable	0	22	Not Available
yes	TCGA-DD-A73A	728	Alive	T1	N0	M0	Stage I	G2																					Mild	71	3.5	4.4	5	TCGA-DD-A73A	B6C0266A-CF34-464A-808D-1D3C28DC90F2	0.1	1.2	Not Available	A	0.8	1.3	1.4	30	-26136	Not Applicable	0	334	Not Available
yes	TCGA-UB-A7ME	486	Alive	T1	NX	MX	Stage I	G2																					Mild	51	3.5	4.2	4.8	TCGA-UB-A7ME	BE1240F0-34DC-4205-B152-C26F11D28462	0.2	0.6	Not Available	B	0.7	1.2	1.1	16	-18846	Not Applicable	0	486	Not Available
yes	TCGA-KR-A7K2	829	Alive	T1	N0	M0	Stage I	G1																					Unknown	64	3.5	3.3	4.9	TCGA-KR-A7K2	FBB398FE-2BA8-4845-8083-6533ECB4A52E	0.2	1.5	Not Available	Unknown	0.7	1.3	1.1	28	-23699	Not Applicable	0	360	Not Available
yes	TCGA-EP-A3JL	303	Alive	T1	NX	MX	Stage I	G2																					Not Available	76	3.2	4.1	4.8	TCGA-EP-A3JL	A196A937-B17D-4D4A-965B-8AF0F4F41367	0	0.6	Not Available	A	0.6	1.1	Not Available	19	-27886	Not Applicable	0	97	Not Available
yes	TCGA-CC-A9FV	0	Alive	T3	N0	M0	Stage IIIA	G2																					Not Available	57	Not Available	Not Available	Not Available	TCGA-CC-A9FV	C4E6527A-8F58-4F6B-93B1-04ABB5680ED0	Not Available	Not Available	Not Available	Unknown	Not Available	Not Available	Not Available	22	-21044	Not Applicable	0	0	Not Available
yes	TCGA-BW-A5NO	20	Alive	T3a	NX	MX	Stage IIIA	G2																					Unknown	50	Not Available	Not Available	Not Available	TCGA-BW-A5NO	EE63C44B-91F4-4004-8DEA-192EAB527036	Not Available	Not Available	Not Available	Unknown	Not Available	Not Available	Not Available	26	-18510	Not Applicable	0	20	Not Available
yes	TCGA-G3-AAV6	65	Dead	T3a	N0	M0	Stage IIIA	G3																					Severe	53	3.4	3.9	5.2	TCGA-G3-AAV6	A6733FA1-030A-45ED-9C24-0E64164D4998	0	1.6	Not Available	A	0.6	1.4	0.9	16	-19556	65	0	Not Available	Not Available
no	TCGA-ZP-A9CV	1088	Dead	T1	NX	MX		G1																					Severe	59	3.5	4	5.7	TCGA-ZP-A9CV	91909C63-DEBC-42AD-B4BE-56870195BDCB	0.2	0.5	Not Available	A	0.7	1.3	0.8	28	-21633	Not Applicable	0	142	Not Available
yes	TCGA-DD-A4ND	2746	Alive	T1	N0	M0	Stage I	G3																					None	56	3.5	3.9	5	TCGA-DD-A4ND	C0BF9278-9CBB-4361-B4D8-AB172B67E276	0.1	0.5	3	A	0.6	1.1	0.7	18	-20782	Not Applicable	0	2141	Not Available
yes	TCGA-ED-A459	910	Alive	T2	N0	M0	Stage II	G2																					Not Available	47	3800	5200	5100	TCGA-ED-A459	56403463-1727-4C23-A709-DE5F168C4073	0.3	1.4	Not Available	Unknown	0.7	1.1	1.1	15	-17402	Not Applicable	0	7	Not Available
yes	TCGA-DD-AADV	574	Alive	T1	N0	M0	Stage I	G3																					None	50	3.8	3.8	5.3	TCGA-DD-AADV	4C78B999-4797-4E19-8BC5-9FFD01CF768A	0.2	0.8	Not Available	A	0.7	1.5	0.9	14	-18300	Not Applicable	0	230	Not Available
yes	TCGA-ED-A66X	406	Alive	T3a	N0	M0	Stage IIIA	G3																					Mild	35	3.8	4.7	5.1	TCGA-ED-A66X	B75CA9E4-A474-4960-9343-C8E9524CD096	0.1	9	Not Available	Unknown	4.1	5.6	4.5	3	-12947	Not Applicable	0	6	Not Available
yes	TCGA-CC-A8HU	344	Dead	T3	N0	M0	Stage IIIA	G3																					Not Available	39	Not Available	Not Available	Not Available	TCGA-CC-A8HU	1943FF2C-CA53-4E3C-ACC1-5AE84F4BA230	Not Available	Not Available	Not Available	Unknown	Not Available	Not Available	Not Available	22	-14367	Not Applicable	0	0	Not Available
yes	TCGA-5C-AAPD	20	Alive	T2	N0	M0	Stage II	G1																					None	61	Not Available	Not Available	Not Available	TCGA-5C-AAPD	7A6162A4-1166-4310-84CD-FFC2B06F124C	Not Available	Not Available	Not Available	A	Not Available	Not Available	Not Available	27	-22552	Not Applicable	0	20	Not Available
yes	TCGA-DD-AAC9	347	Alive	T1	N0	M0	Stage I	G2																					Mild	51	3.8	4.2	5.3	TCGA-DD-AAC9	AC6A1E0C-DBA0-4B21-B12B-A501ED796BEC	0.2	0.7	Not Available	A	0.7	1.5	1.3	28	-18911	Not Applicable	0	347	Not Available
yes	TCGA-2Y-A9GX	2442	Alive	T1	NX	MX	Stage I	G2																					None	68	3.5	4.3	5	TCGA-2Y-A9GX	D6C2C6CE-3483-4FE5-AEF6-E40419F728CF	0.2	0.4	Not Available	Unknown	0.8	1.5	0.7	3	-24963	Not Applicable	0	2442	Not Available
yes	TCGA-G3-A25V	860	Alive	T1	N0	M0	Stage I	G2		YES	Radiofrequency Ablation	Not Applicable	770	1	1	TCGA-G3-A25V-A40090	0E4F99EC-723C-4BA0-A89F-2C181F9054EE	12	NO	Not Available	Not Available	Not Applicable	Not Available	Not Available	Not Applicable	2	2013		None	68	0.3	0.4	0.5	TCGA-G3-A25V	F435EC00-0DB8-46B4-96BF-890A9D931DF3	0	0.6	0	A	0.6	1.4	0.7	27	-25144	Not Applicable	0	69	Not Available
yes	TCGA-DD-AAVW	2317	Alive	T1	N0	M0	Stage I	G2																					None	35	3.3	4.6	5.2	TCGA-DD-AAVW	11823A8A-194F-4E6B-A373-EF5A3FC7D2B9	0.2	1.4	Not Available	A	0.7	1.4	1.1	13	-12986	Not Applicable	0	1867	Not Available
yes	TCGA-ED-A7PY	390	Alive	T2	NX	M0	Stage II	G3		YES	Ethanol Injection;Ethanol Injection;Ethanol Injection	Not Applicable;Not Applicable;Not Applicable	20;53;82	Not Available;Not Available;Not Available	Not Available;Not Available;Not Available	TCGA-ED-A7PY-A64278	867D2F96-7949-4978-8BF0-0176298728EF	28	NO	Not Available;Not Available;Not Available	Not Available;Not Available;Not Available	Not Applicable;Not Applicable;Not Applicable	Not Available;Not Available;Not Available	Not Available;Not Available;Not Available	Not Applicable;Not Applicable;Not Applicable	8	2014		Mild	20	Not Available	Not Available	Not Available	TCGA-ED-A7PY	A396E048-5AA0-4D71-96BD-7F4FDF6934AA	0.1	0.6	Not Available	Unknown	4	5.8	3.9	7	-7556	Not Applicable	0	6	Not Available
yes	TCGA-DD-AADG	1145	Alive	T3a	N0	M0	Stage IIIA	G3																					Mild	70	3.8	4.2	5.3	TCGA-DD-AADG	89D1261C-6D93-4298-A2AF-B5FF52BE0CB6	0.2	0.9	Not Available	A	0.7	1.5	1	7	-25887	Not Applicable	0	808	Not Available
yes	TCGA-ED-A7XO	427	Alive	T3a	N0	M0	Stage IIIA	G2																					Mild	29	3.8	4.2	5.1	TCGA-ED-A7XO	20BB3855-66E2-46D4-B189-006B4B254C2E	0.1	0.6	Not Available	Unknown	4.1	5.9	4.9	5	-10828	Not Applicable	0	6	Not Available
yes	TCGA-UB-A7MA	848	Alive	T2b	N0	M0	Stage II	G2		YES	Radiofrequency Ablation	Not Applicable	295	4	1	TCGA-UB-A7MA-A63550	DD46242B-D31B-4035-9A6F-D3C7547F3F36	12	YES	294	Mitomycin C	Not Applicable	Chemoembolization	Other, specify	Ethiodol	8	2014		None	62	3.4	4	5	TCGA-UB-A7MA	10179EFC-A091-4119-8EC2-30DB6269D674	0	1.2	Not Available	A	0.4	0.9	0.7	12	-22843	Not Applicable	0	455	Not Available
yes	TCGA-2Y-A9GY	757	Dead	T2	NX	MX	Stage II	G3																					None	64	3.5	4.2	5	TCGA-2Y-A9GY	75030B63-59AF-4705-86E7-3A431B7CF65A	0.2	0.4	2	Unknown	0.8	1.5	0.6	3	-23435	757	0	Not Available	Not Available
yes	TCGA-CC-A7IF	649	Dead	T3	N0	M0	Stage IIIA	G1																					Not Available	59	Not Available	Not Available	Not Available	TCGA-CC-A7IF	E0674B82-2FBA-421E-BE62-58EFD0348D44	Not Available	Not Available	Not Available	Unknown	Not Available	Not Available	Not Available	22	-21845	Not Applicable	0	0	Not Available
yes	TCGA-DD-AACV	1531	Alive	T1	N0	M0	Stage I	G3		NO						TCGA-DD-AACV-A66126	78616A41-C91B-46B3-8DA4-1A7FD79F8516	2	YES	345;803;855;968	Other;Other;Other;Other	adriamycin;adriamycin;adriamycin;adriamycin	Chemoembolization;Chemoembolization;Chemoembolization;Chemoembolization	Other, specify;Other, specify;Other, specify;Other, specify	lipidol;lipidol;lipidol;lipidol	10	2014		Unknown	53	3.8	4.3	5.3	TCGA-DD-AACV	8E79EA29-787E-4A33-8465-9891776F47ED	0.2	0.6	Not Available	A	0.7	1.5	1.2	29	-19660	Not Applicable	0	1210	Not Available
yes	TCGA-CC-A7IG	299	Dead	T2	N0	M0	Stage II	G2																					Not Available	47	Not Available	Not Available	Not Available	TCGA-CC-A7IG	534A7B11-3ABD-4581-A9C9-D984D6AA33A0	Not Available	Not Available	Not Available	Unknown	Not Available	Not Available	Not Available	22	-17453	Not Applicable	0	0	Not Available
yes	TCGA-WQ-AB4B	395	Alive	T2	NX	M0	Stage II	G2																					Not Available	62	3.5	3.3	5	TCGA-WQ-AB4B	D5471A2B-F14C-44DE-9142-5A5FB07B6FC2	0.3	1.7	Not Available	A	0.4	1.2	1.1	18	-22769	Not Applicable	0	122	Not Available
no	TCGA-ZP-A9CZ	706	Alive	T1	NX	MX		G1																					Not Available	72	3.5	4.4	5.2	TCGA-ZP-A9CZ	22077056-067D-4DB5-98E5-106778CECA56	0.2	0.5	2	A	Not Available	Not Available	Not Available	28	-26403	Not Applicable	0	706	Not Available
yes	TCGA-DD-A4NE	660	Dead	T3a	N0	M0	Stage IIIA	G3																					None	75	3.5	4.2	5	TCGA-DD-A4NE	BCE25281-502E-4599-9679-32DC8462FFB1	0.1	0.9	3	A	0.6	1	0.8	21	-27549	660	0	Not Available	Not Available
yes	TCGA-G3-A7M6	632	Alive	T1	NX	MX	Stage I	G3																					Mild	60	3.3	3.6	4.8	TCGA-G3-A7M6	2681F83D-233F-4EA2-B5E6-3C05AF81F123	0	0.5	Not Available	A	0.4	1.1	0.6	5	-22205	Not Applicable	0	366	Not Available
yes	TCGA-DD-AADQ	436	Alive	T2	N0	M0	Stage II	G3																					Unknown	59	3.8	4.4	5.3	TCGA-DD-AADQ	485D283A-552C-485A-84FB-3ABDB98DC797	0.2	0.3	Not Available	A	0.7	1.5	0.7	7	-21756	Not Applicable	0	161	Not Available
yes	TCGA-DD-A3A8	11	Dead	T2	N0	M0	Stage II	G2																					None	75	Not Available	Not Available	Not Available	TCGA-DD-A3A8	69D6881B-9E9A-407B-8B02-BAD5FC2455BF	0.1	1	3	A	0.8	1.2	0.9	6	-27524	11	0	Not Available	Not Available
no	TCGA-MI-A75I	630	Alive	T2	NX	MX		G1																					Not Available	61	Not Available	Not Available	Not Available	TCGA-MI-A75I	55E53229-C58F-4922-8869-0F5E2F6C2D7D	Not Available	Not Available	3	A	Not Available	Not Available	Not Available	20	-22341	Not Applicable	0	265	Not Available
yes	TCGA-DD-A4NQ	373	Dead	T2	N0	M0	Stage II	G3		NO						TCGA-DD-A4NQ-A43378	73A0E12B-2408-4494-9858-C79A32E695B3	20	YES	148;211	Not Available;Not Available	Not Applicable;Not Applicable	Radioembolization;Radioembolization	Y-90 Therasphere;Y-90 Therasphere	Not Applicable;Not Applicable	5	2013		Mild	60	3.5	4.4	5	TCGA-DD-A4NQ	C05720FE-19C1-4CFF-819B-6806B26FC312	0.1	0.7	1	A	0.8	1.3	0.8	11	-22111	373	0	Not Available	Not Available
yes	TCGA-G3-A5SL	621	Alive	T2	NX	M0	Stage II	G2																					None	70	3.1	4.2	4.7	TCGA-G3-A5SL	9A56D8A8-DADD-442E-BC09-732CD619AEF7	0	0.8	Not Available	Unknown	0.6	1.4	1	15	-25671	Not Applicable	0	243	Not Available
yes	TCGA-GJ-A9DB	67	Dead	T1	N0	MX	Stage I	G2																					Unknown	68	3.5	4.5	5	TCGA-GJ-A9DB	45F00F00-D793-4DCA-AEB9-7626D4575C90	0	0.5	1	Unknown	0.8	1.4	1.1	7	-25020	67	0	Not Available	Not Available
yes	TCGA-DD-AAD5	1345	Alive	T1	N0	M0	Stage I	G3																					Mild	54	3.8	3.7	5.3	TCGA-DD-AAD5	6312D5B5-68AD-4D4F-A0A9-03D895AE30F9	0.2	0.6	Not Available	A	0.7	1.5	0.6	7	-19748	Not Applicable	0	1037	Not Available
yes	TCGA-BW-A5NQ	0	Alive	T1	NX	MX	Stage I	G3																					Unknown	63	Not Available	Not Available	Not Available	TCGA-BW-A5NQ	C7F1B389-AEC7-4993-8AFB-B7A56064F8FC	Not Available	Not Available	Not Available	Unknown	Not Available	Not Available	Not Available	26	-23353	Not Applicable	0	0	Not Available
yes	TCGA-G3-A3CH	780	Alive	T3a	N0	M0	Stage IIIA	G2																					Severe	53	0.3	0.3	0.5	TCGA-G3-A3CH	3A2D7482-C246-411E-841F-71D96E353328	0	0.7	Not Available	A	0.6	1.4	0.9	11	-19473	Not Applicable	0	193	Not Available
yes	TCGA-FV-A4ZQ	12	Alive	T1	NX	M0	Stage I	G2																					Unknown	52	3.8	2.4	5	TCGA-FV-A4ZQ	65E430E1-0C9A-4045-83A9-653B7CFF811D	0.2	1.8	Not Available	Unknown	0.7	1	1	15	-19090	Not Applicable	0	12	Not Available
no	TCGA-ZP-A9D0	1091	Alive	T1	NX	MX		G1																					Mild	67	3.5	4.1	5.2	TCGA-ZP-A9D0	396EF7C2-343E-4D5C-9B20-ADC0A52C1978	0.2	1.4	Not Available	A	0.5	1.1	0.9	28	-24525	Not Applicable	0	717	Not Available
[truncated: 149 more columns]
